# Supplementary material
Source: PubMed Central journal article supplement (PMC3709054)
Supplement: supp_JCO.2012.44.2137_Supplementary_Tables_JCO.2012.44.2137.pdf [file supp_JCO.2012.44.2137_Supplementary_Tables_JCO.2012.44.2137.pdf]

# Follicular Lymphoma Cells Induce Changes in T-Cell Gene Expression and Function that Alter Prognosis and Risk of Transformation

Kiaii, et al

Methods and Supplementary Tables 1– 6

## **Methods**

### **Ethical considerations and samples**

Ethical approval for the study was obtained from the East London and The City HA Local Research Ethics Committee 3, REC reference number 05/Q0605/140 in compliance with the recently revised Helsinki protocol. The cryopreserved cell suspensions were obtained from a Tissue Bank (Human Tissue Act 2004 deemed license no. 12199), collected and maintained by the Centre of Haemato-Oncology of St Bartholomew's Hospital. All patients consented to storage of specimens for research purposes. Control PBMCs were obtained from healthy volunteers and buffy coats supplied by the National Blood Service. Mononuclear cells were obtained by Ficoll-Hypaque (Axis Shield) density gradient centrifugation.

Cryopreserved single cell suspensions of lymph node (LN) were obtained from previously untreated FL patients at diagnosis (12 for gene array and real-time, 4 for co-culture and 7 for motility assay), reactive tonsils (7 for gene array, 10 for real-time, 4 for co-culture and 4 for motility assay) and, PBMCs from 10 AML patient and fresh PBMCs from 10 age-matched healthy volunteers. After flow sorting, in three patient samples there were insufficient number of CD8 TILs for study.

### **Immunophenotyping and cell sorting**

All antibodies were obtained from BD Biosciences. All cells were initially preincubated for 20 minutes with human anti-globulin (Sigma-Aldrich) to block Fc receptors. For gene array analysis highly purified TIL subsets were obtained by cell sorting on a BD Aria by excluding debris/nonviable cells and gating on CD19<sup>-</sup>CD4<sup>+</sup> and CD19<sup>-</sup>CD8<sup>+</sup> cells. Staining of these cells was performed with phycoerythrin (PE)-conjugated anti-CD4, fluorescein isothiocyanate (FITC)-conjugated anti-CD8, and Peridinin-Chlorophyll-Protein Complex (PerCP)-conjugated anti-CD19 Abs before resuspension in a 4,6 diamidino-2-phenylindole (DAPI) containing solution of 2% heat-inactivated fetal calf serum (FCS) with phosphate buffered solution (PBS). Subsequently a portion of cells were checked for purity using flow cytometry (FACS) on a BD LSR2 after adding allophycocyanin (APC)-conjugated anti-CD3 Ab and by gating on CD19<sup>-</sup>CD3<sup>+</sup>CD4<sup>+</sup>, CD19<sup>-</sup>CD3<sup>+</sup>CD8<sup>+</sup> and, CD19<sup>+</sup> which for all samples purity verified over 96% with < 2% B-cell contamination. FACS data analysis was performed using FlowJo (TreeStar Inc) software. For other purposes untouched T-cells were sorted using CD4 and CD8 T-Cell Isolation Kits II (Miltenyi Biotec) and purity checks were performed thereafter. B cells were positively separated using Miltenyi's CD19 magnetic microbead. Purity of the magnetically sorted cells was always >90%.

### **Gene expression profiling**

The Affymetrix Expression GeneChip Protocol 1-cycle procedure was used to synthesize biotin-labelled cRNA which following fragmenting was used for hybridization onto Affymetrix Human Genome U133 plus 2.0 GeneChips. One µg total RNA was used as starting material. Following hybridization, quality-control data (noise signal, scale factor, background noise, present or absent probes and, 3'/5' signal ratio for housekeeping genes) were assessed before further analysis and they all passed the required criteria. GeneChip data analysed using Partek and R softwares by two independent experts who reached to 99% similarity in the extracted results. Pathway analysis was performed using Ingenuity software (Ingenuity Systems Inc). The gene profiling data discussed in this publication have been deposited in

National Centre for Biotechnology Information (NCBI)'s Gene Expression Omnibus (GEO) and are accessible through GEO Series accession number GSE27928.

### **RNA extraction and cDNA synthesis**

RNAs were always extracted from cell fractions using the RNeasy Mini Kit (Qiagen) according to manufacturer's instruction. Quality and quantity of RNAs were checked using Agilent Bioanalyzer and NanoDrop Spectrophotometer (Thermo Scientific), respectively, before subsequent use. For QRT-PCR, cDNA was generated from 100 ng RNA using random hexamers and M-MLV RT(H-) (Promega) in a 25 $\mu$ L reaction according to manufacturer's instruction.

### **Quantitative Real Time-PCR (QRT-PCR)**

Gene expression changes observed by microarray were validated by QRT-PCR. cDNA (0.5 $\mu$ L) was subsequently used in 20  $\mu$ L QRT-PCR reactions using Applied Biosystems Taqman Gene Expression Assays. 18S ribosomal RNA was used as endogenous control. Reactions were performed in triplicates on Applied Biosystems 7900HT Fast Real-Time PCR machine using the standard thermal cycler protocol. After preliminary validation the change in expression of each target gene was calculated relative to the endogenous control gene using the  $2^{-\Delta\Delta CT}$  method as previously described<sup>1</sup>. All the primer/probe sets (PMCH, ETV1, CAV1, CRTAM and, CXCL13) and reaction materials were purchased from Applied Biosystems.

### **The reason for choosing genes for further study**

Five dysregulated genes were selected for further investigation, two of which (PMCH and ETV1) were up-regulated in common in both CD4 and CD8 cells, CAV1 and CXCL13 over-expressed on CD8 cells and CRTAM over-expressed on CD4 cells. These genes were selected since they have minimal expression in FL cells, tonsillar B cells, PB T cells of AML patients (another B-cell malignancy) and healthy donors and appear specific for TILs in FL patients, suggest their potential involvement in the pathophysiology of this disease. Importantly, we demonstrate that changes in these genes can be induced at the healthy T cells following short-term co-culture with direct or indirect contact with FL cells. Two Abs for CD137 (TNFRSF9) and two for ACTN1 were tested for TMA but did not provide reliable results.

### **Tissue Microarrays**

The results of the gene expression profiling were also verified using Tissue Microarrays (TMAs) of 4 genes (PMCH, ETV1, NAMPT (Visfatin-1), and CD200) for which appropriate Abs for paraffin embedded sections were available (mouse anti-PMCH, Abnova; rabbit anti-ETV1, Abcam; rabbit anti-NAMPT, Sigma; rabbit anti-CD200, Sigma ). The validation set TMAs was prepared as triplicates from 1-mm diameter cores selected from patients with FL (n= 172) at diagnosis at St Bartholomew's hospital in whom clinical outcome was available. Median age of the patients was 56yr (range 24-85) with 40% female and 41 patients had undergone subsequent histologic transformation confirmed by biopsy at the time of transformation. Reactive follicular hyperplasia lymph node samples (n=12) were arrayed as controls. TMAs construction, immunohistochemistry (IHC) staining and analysing was performed as previously described<sup>2</sup>. Stained slides were evaluated for percentage of positive cells and expression (mean intensity) using computerized image analysis system (Ariol,

Applied Imaging™, Genetix) using pathologist-trained visual parameters including location relative to the neoplastic follicle: interfollicular, intrafollicular, and total core area (interfollicular-intrafollicular). Expert histopathologist analysis independently validated the IHC staining and automated analysis results. The double immunofluorescence labelling of paraffin embedded sections was performed as previously mentioned<sup>3</sup> using antibodies anti-CD3 (Labvision, clone SP7), anti-PMCH (Abnova), anti-MCHR2 (Sigma SAB2900027) and anti-CD68 (DAKO clone KP1). All patients provided consent for excess biopsy tissue to be used for research purposes and ethical approval obtained (05/Q0605/140).

### **Co-culturing**

To study the direct impact of FL cells on T-cells, pure healthy allogeneic PB T-cells ( $1 \times 10^6$ /mL) and FL cells or healthy allogeneic tonsillar B cells ( $1 \times 10^6$ /mL) were co-cultured together in full culture medium for 48 hr (6-well culture plate). To analyze the impact on T cells of soluble-derived tumor factors, healthy T cells (lower well;  $1 \times 10^6$ /mL) were incubated with FL cells or healthy allogeneic B-cells (upper chamber;  $1 \times 10^6$ /mL; 1:1 ratio) in 6-well transwell plates (0.4  $\mu$ m pore cell culture insert 353090, BD) for 48 hrs. After co-culture, cells were harvested and T cells isolated by MACS negative selection for subsequent flow cytometry purity analysis (>90%) and QRT-PCR.

### **Time-lapse imaging**

Random movement of CD4 and CD8 TILs were assessed on Intercellular Adhesion Molecule (ICAM)-1 coated slides. Sorted CD4 and CD8 TILs were incubated for overnight in RPMI 1640 supplemented with 10% heat-inactivated FCS at 37°C and 5% CO<sub>2</sub> prior to the assay. We coated  $\mu$ -Slides VI ibiTreat 80606 (ibidi GmbH, Germany) overnight at 4°C with 3  $\mu$ g/ml ICAM-1-Fc and then blocked them with 2% BSA in PBS at room temperature for 1hr as previously published<sup>4</sup>. The slide was then washed twice and  $1 \times 10^5$  lymphocytes in 100 $\mu$ L of HBSS with 20 mM HEPES buffer and 1 $\mu$ g chemokine C-X-C motif ligand 12 (CXCL12(SDF1- $\alpha$ ); R&D, Minneapolis, MN 55413, USA) were mixed and applied to the slide. Images were taken with a Nikon BioStation IM microscope (Nikon UK Limited, UK), using a 20 $\times$  objective lens and the BioStation software (Nikon) at 20-sec intervals for 1hr. The cells were tracked and analysed with NIS-Element AR software (Nikon). Motility Index was calculated by the average frequency of motile cells from three microscopic fields of 20x objective lens multiplied by their average velocity ( $\mu$ m/S).

### **Statistical analysis**

The expression data was analysed within the R statistical environment<sup>5</sup> using Bioconductor (<http://www.bioconductor.org>) packages. Stringent quality control criteria were applied to the data and no probes were found to be of low quality. To detect differentially expressed genes between healthy and FL samples for both CD4 and CD8 subtypes Limma<sup>6</sup> was used to fit a linear model to normalise expression data for each probe. False Discovery Rates (FDRs) were estimated using the Benjamini-Hochberg method<sup>7</sup>. An FDR cut-off of 0.05 and a log<sub>2</sub> fold change cut-off of 1 was applied to filter the list of differentially expressed genes. For survival analysis Kaplan-Meier plot and the Gehan-Breslow-Wilcoxon method was used. For the multivariate analysis patients' gender, age, grade and, stage together with PMCH, ETV1 and NAMPT levels were used to fit a multivariate statistical model using the Cox Proportional Hazards regression model. Two models were created one using time to death/date of last

follow up as the end point and another using time to transformation/date of last follow up as the end point. The confidence interval for p-value significance was set to 0.95. Cases with missing data were excluded from analysis. Recursive partitioning was used to generate optimal cut-off values discriminating prognostic groups for the survival parameters and group comparisons performed by the chi-square test<sup>8</sup>. The accuracy of the applied cut-off levels was also independently checked by T-test which also revealed to be highly significant ( $p < 0.0003$ ). Unpaired t-test was performed to determine whether the incidence of antigen expression was significantly different between samples from patients and controls and the significance level was set below 0.05. T-test was also applied to the Motility Index derived from time-lapse study. All statistical tests were two-sided.

.....

1. Abdalla AO, Kiaii S, Hansson L, et al: Kinetics of cytokine gene expression in human CD4+ and CD8+ T-lymphocyte subsets using quantitative real-time PCR. *Scand J Immunol* 58:601-6, 2003
2. Lee AM, Clear AJ, Calaminici M, et al: Number of CD4+ cells and location of forkhead box protein P3-positive cells in diagnostic follicular lymphoma tissue microarrays correlates with outcome. *J Clin Oncol* 24:5052-9, 2006
3. Mason DY, Micklem K, Jones M: Double immunofluorescence labelling of routinely processed paraffin sections. *J Pathol* 191:452-61, 2000
4. Svensson L, Howarth K, McDowall A, et al: Leukocyte adhesion deficiency-III is caused by mutations in KINDLIN3 affecting integrin activation. *Nat Med* 15:306-12, 2009
5. Team RDC: R: A language and environment for statistical computing. R Foundation for Statistical Computing, Vienna, Austria. 1, 2010
6. Smyth GK: Linear models and empirical bayes methods for assessing differential expression in microarray experiments. *Stat Appl Genet Mol Biol* 3:Article3, 2004
7. Benjamini Y, Hochberg Y: Controlling the false discovery rate - A practical approach to multiple testing. *Journal of the Royal Statistical Society - Series B: Statistical Methodology*.:289-300, 1995
8. Camp RL, Dolled-Filhart M, Rimm DL: X-tile: a new bio-informatics tool for biomarker assessment and outcome-based cut-point optimization. *Clin Cancer Res* 10:7252-9, 2004

Supplemental Table 1

| Dysregulated genes in CD4 TILs |             |                                                              |            |
|--------------------------------|-------------|--------------------------------------------------------------|------------|
| AGI                            | Gene symbol | Gene Name                                                    | log2FC     |
| NM_0012674                     | PMCH        | pro-melanin-concentrating hormone                            | 3.20357727 |
| AI935096                       | NR4A2       | nuclear receptor subfamily 4, group A, member 2              | 3.13820137 |
| AA873350                       | NAMPT       | nicotinamide phosphoribosyltransferase                       | 2.58129289 |
| BF339445                       | CHN1        | chimerin (chimaerin) 1                                       | 2.336788   |
| NM_001561                      | TNFRSF9     | tumor necrosis factor receptor superfamily, member 9         | 2.26320435 |
| NM_021963                      | NAP1L2      | nucleosome assembly protein 1-like 2                         | 2.25298879 |
| AK026714                       | PELI1       | pellino homolog 1 (Drosophila)                               | 2.16680283 |
| AV713062                       | MAP3K8      | mitogen-activated protein kinase kinase kinase 8             | 2.16147163 |
| AI857639                       | PMAIP1      | phorbol-12-myristate-13-acetate-induced protein 1            | 2.12556752 |
| NM_002104                      | GZMK        | granzyme K (granzyme 3; tryptase II)                         | 2.11447536 |
| AA769986                       | NUPL1       | nucleoporin like 1                                           | 2.11380035 |
| AA828049                       | YME1L1      | YME1-like 1 (S. cerevisiae)                                  | 2.01925314 |
| NM_006732                      | FOSB        | FBJ murine osteosarcoma viral oncogene homolog B             | 1.99063985 |
| AA215701                       | SNORA28     | small nucleolar RNA, H/ACA box 28                            | 1.97345271 |
| NM_019604                      | CRTAM       | cytotoxic and regulatory T cell molecule                     | 1.96843725 |
| NM_005442                      | EOMES       | eomesodermin homolog (Xenopus laevis)                        | 1.93324808 |
| AA580082                       | GSPT1       | G1 to S phase transition 1                                   | 1.92210241 |
| X99268                         | TWIST1      | twist homolog 1 (Drosophila)                                 | 1.91073647 |
| NM_001394                      | DUSP4       | dual specificity phosphatase 4                               | 1.88557152 |
| AI819150                       | ASXL1       | additional sex combs like 1 (Drosophila)                     | 1.88160687 |
| AI671885                       | SLC20A1     | solute carrier family 20 (phosphate transporter), member     | 1.83856843 |
| BC036731                       | ZBTB24      | zinc finger and BTB domain containing 24                     | 1.81621939 |
| AA872471                       | SNRPA1      | small nuclear ribonucleoprotein polypeptide A'               | 1.8150811  |
| BE247450                       | CHD2        | chromodomain helicase DNA binding protein 2                  | 1.76502373 |
| AI813331                       | DIAPH3      | diaphanous homolog 3 (Drosophila)                            | 1.75107636 |
| AI760495                       | CYCS        | cytochrome c, somatic                                        | 1.74010784 |
| BF446578                       | RASGEF1A    | RasGEF domain family, member 1A                              | 1.68319254 |
| NM_003151                      | STAT4       | signal transducer and activator of transcription 4           | 1.67479941 |
| AV726956                       | BEX5        | brain expressed, X-linked 5                                  | 1.66606876 |
| AV700298                       | CD44        | CD44 molecule (Indian blood group)                           | 1.65821769 |
| AL519710                       | CADM1       | cell adhesion molecule 1                                     | 1.64319157 |
| AI094580                       | NME7        | non-metastatic cells 7, protein expressed in (nucleoside-d   | 1.63315494 |
| AF050145                       | IDS         | iduronate 2-sulfatase                                        | 1.61948057 |
| U39226                         | MYO7A       | myosin VIIA                                                  | 1.6140942  |
| AI208342                       | DCAF8       | DDB1 and CUL4 associated factor 8                            | 1.60348695 |
| AF130079                       | PRO2852     | hypothetical protein PRO2852                                 | 1.60318971 |
| BE549540                       | CYSLTR1     | cysteinyl leukotriene receptor 1                             | 1.5944598  |
| NM_006159                      | NELL2       | NEL-like 2 (chicken)                                         | 1.58296466 |
| AV683684                       | RPS27       | ribosomal protein S27                                        | 1.58121633 |
| AL136944                       | SLC40A1     | solute carrier family 40 (iron-regulated transporter), mem   | 1.57186124 |
| AK096036                       | FLJ38717    | FLJ38717 protein                                             | 1.57130165 |
| AA828371                       | VPS13C      | vacuolar protein sorting 13 homolog C (S. cerevisiae)        | 1.56680733 |
| NM_005780                      | LHFP        | lipoma HMGIC fusion partner                                  | 1.55421285 |
| AF052094                       | EPAS1       | endothelial PAS domain protein 1                             | 1.53347743 |
| AA974416                       | PPP2R2B     | protein phosphatase 2 (formerly 2A), regulatory subunit E    | 1.52176519 |
| AY034790                       | CCNL1       | cyclin L1                                                    | 1.51349776 |
| AA741493                       | ZFAND6      | zinc finger, AN1-type domain 6                               | 1.50300985 |
| BE646573                       | NFKBIZ      | nuclear factor of kappa light polypeptide gene enhancer ir   | 1.49839047 |
| AI631159                       | SLC2A3      | solute carrier family 2 (facilitated glucose transporter), m | 1.49546306 |
| BF514552                       | FCRL3       | Fc receptor-like 3                                           | 1.48381018 |
| AI795908                       | PHLDA1      | pleckstrin homology-like domain, family A, member 1          | 1.47510751 |

|           |              |                                                                          |            |
|-----------|--------------|--------------------------------------------------------------------------|------------|
| AB023212  | PCNX         | pecanex homolog (Drosophila)                                             | 1.47149851 |
| BF438386  | RAB27B       | RAB27B, member RAS oncogene family                                       | 1.46416438 |
| AI700608  | MORF4L2      | mortality factor 4 like 2                                                | 1.46320402 |
| BE675139  | CREB3L2      | cAMP responsive element binding protein 3-like 2                         | 1.45930084 |
| AI239832  | UBE2D3       | ubiquitin-conjugating enzyme E2D 3 (UBC4/5 homolog, y                    | 1.45218227 |
| AL832250  | SNRPN        | small nuclear ribonucleoprotein polypeptide N                            | 1.44999677 |
| U23772    | XCL1         | chemokine (C motif) ligand 1                                             | 1.44725128 |
| BF673779  | TMEM155      | transmembrane protein 155                                                | 1.43451077 |
| AL562860  | MBNL1        | muscleblind-like (Drosophila)                                            | 1.43352182 |
| NM_000956 | PTGER2       | prostaglandin E receptor 2 (subtype EP2), 53kDa                          | 1.41554349 |
| NM_005201 | CCR8         | chemokine (C-C motif) receptor 8                                         | 1.40939489 |
| AI936531  | SFRS18       | splicing factor, arginine/serine-rich 18                                 | 1.40131482 |
| NM_016533 | NINJ2        | ninjurin 2                                                               | 1.39186734 |
| BC042469  | RP3-527F8.2  | hypothetical protein LOC100128420                                        | 1.37926251 |
| AI261467  | IKZF4        | IKAROS family zinc finger 4 (Eos)                                        | 1.37570982 |
| AL834350  | PPP2R5C      | protein phosphatase 2, regulatory subunit B', gamma isof                 | 1.37009731 |
| NM_002371 | MAL          | mal, T-cell differentiation protein                                      | 1.35442785 |
| NM_003243 | TGFBR3       | transforming growth factor, beta receptor III                            | 1.35328027 |
| BG542501  | C13orf15     | chromosome 13 open reading frame 15                                      | 1.35221815 |
| NM_000919 | PAM          | peptidylglycine alpha-amidating monooxygenase                            | 1.35137584 |
| AW978896  | TRA2A        | transformer 2 alpha homolog (Drosophila)                                 | 1.34630959 |
| NM_004289 | NFE2L3       | nuclear factor (erythroid-derived 2)-like 3                              | 1.34586878 |
| NM_000589 | IL4          | interleukin 4                                                            | 1.34580258 |
| AW084068  | N4BP2L2      | NEDD4 binding protein 2-like 2                                           | 1.34084107 |
| AI300126  | SCARNA17     | small Cajal body-specific RNA 17                                         | 1.33764188 |
| K03122    | IL2RA        | interleukin 2 receptor, alpha                                            | 1.33579122 |
| NM_014380 | NGFRAP1      | nerve growth factor receptor (TNFRSF16) associated prot                  | 1.33459371 |
| NM_053055 | THEM4        | thioesterase superfamily member 4                                        | 1.33323944 |
| NM_012317 | LDOC1        | leucine zipper, down-regulated in cancer 1                               | 1.3270985  |
| BE552334  | EIF5         | eukaryotic translation initiation factor 5                               | 1.32134724 |
| AB028966  | TTC28        | tetratricopeptide repeat domain 28                                       | 1.31973837 |
| AW665138  | RTKN2        | rhotekin 2                                                               | 1.31130531 |
| AI590088  | TEAD1        | TEA domain family member 1 (SV40 transcriptional enhar                   | 1.31059614 |
| AA805939  | REV3L        | REV3-like, catalytic subunit of DNA polymerase zeta (yeas                | 1.3105575  |
| AB014511  | ATP9A        | ATPase, class II, type 9A                                                | 1.30926791 |
| BF446719  | WIPF1        | WAS/WASL interacting protein family, member 1                            | 1.30456442 |
| AI244908  | SOCS3        | suppressor of cytokine signaling 3                                       | 1.30243801 |
| NM_001677 | ATP1B1       | ATPase, Na <sup>+</sup> /K <sup>+</sup> transporting, beta 1 polypeptide | 1.28608692 |
| T97717    | PSME4        | proteasome (prosome, macropain) activator subunit 4                      | 1.2835857  |
| NM_004114 | FGF13        | fibroblast growth factor 13                                              | 1.27571163 |
| W93523    | EPC1         | enhancer of polycomb homolog 1 (Drosophila)                              | 1.27339811 |
| BE675435  | KLF6         | Kruppel-like factor 6                                                    | 1.26868716 |
| BE046511  | FNBP1        | formin binding protein 1                                                 | 1.26147582 |
| AA250935  | LPXN         | leupaxin                                                                 | 1.25874507 |
| BF002296  | JMJD1C       | jumonji domain containing 1C                                             | 1.24971477 |
| BE881590  | ETV1         | ets variant 1                                                            | 1.24719052 |
| BC022477  | RNF103       | ring finger protein 103                                                  | 1.24685367 |
| AL047052  | LOC100190986 | hypothetical LOC100190986                                                | 1.24398447 |
| U23850    | ITPR1        | inositol 1,4,5-triphosphate receptor, type 1                             | 1.2373586  |
| AA579047  | PIK3C2A      | phosphoinositide-3-kinase, class 2, alpha polypeptide                    | 1.23699016 |
| NM_152641 | ARID2        | AT rich interactive domain 2 (ARID, RFX-like)                            | 1.23603435 |
| NM_013416 | NCF4         | neutrophil cytosolic factor 4, 40kDa                                     | 1.2307508  |
| NM_022162 | NOD2         | nucleotide-binding oligomerization domain containing 2                   | 1.23052705 |

|           |            |                                                             |            |
|-----------|------------|-------------------------------------------------------------|------------|
| NM_000594 | TNF        | tumor necrosis factor (TNF superfamily, member 2)           | 1.22286131 |
| AU150319  | VAMP1      | vesicle-associated membrane protein 1 (synaptobrevin 1)     | 1.2226736  |
| NM_014241 | PTPLA      | protein tyrosine phosphatase-like (proline instead of catal | 1.2122228  |
| NM_052889 | CARD16     | caspase recruitment domain family, member 16                | 1.19733803 |
| BE964043  | SKP1       | S-phase kinase-associated protein 1                         | 1.19652667 |
| NM_003877 | SOCS2      | suppressor of cytokine signaling 2                          | 1.19069114 |
| NM_001449 | FHL1       | four and a half LIM domains 1                               | 1.18814037 |
| AF188179  | GNG8       | guanine nucleotide binding protein (G protein), gamma 8     | 1.18730706 |
| AW973232  | NCRNA00182 | non-protein coding RNA 182                                  | 1.18670863 |
| M87507    | CASP1      | caspase 1, apoptosis-related cysteine peptidase (interleuk  | 1.18060299 |
| NM_018015 | CXorf57    | chromosome X open reading frame 57                          | 1.17302261 |
| BF593977  | MED31      | mediator complex subunit 31                                 | 1.16773356 |
| AA935633  | QKI        | quaking homolog, KH domain RNA binding (mouse)              | 1.16413104 |
| AI458439  | IKZF2      | IKAROS family zinc finger 2 (Helios)                        | 1.16111037 |
| AI972469  | ZBTB11     | zinc finger and BTB domain containing 11                    | 1.15585841 |
| AL574435  | B4GALT1    | UDP-Gal:betaGlcNAc beta 1,4- galactosyltransferase, poly    | 1.15100969 |
| AK027156  | PCSK7      | proprotein convertase subtilisin/kexin type 7               | 1.1501584  |
| AW170571  | CPNE2      | copine II                                                   | 1.14825046 |
| NM_005466 | MED6       | mediator complex subunit 6                                  | 1.14809307 |
| AF161419  | ING3       | inhibitor of growth family, member 3                        | 1.14781254 |
| BF345728  | LOC147727  | hypothetical LOC147727                                      | 1.13358853 |
| NM_004538 | NAP1L3     | nucleosome assembly protein 1-like 3                        | 1.1321794  |
| AU147079  | KRR1       | KRR1, small subunit (SSU) processome component, homoc       | 1.13030028 |
| BF672975  | LPL        | lipoprotein lipase                                          | 1.12718208 |
| AI692879  | DLG1       | discs, large homolog 1 (Drosophila)                         | 1.11956799 |
| AV700621  | TGFB1      | transforming growth factor, beta receptor 1                 | 1.1166463  |
| AI475544  | MALAT1     | metastasis associated lung adenocarcinoma transcript 1 (i   | 1.1137717  |
| BF063235  | RLIM       | ring finger protein, LIM domain interacting                 | 1.10976026 |
| NM_003855 | IL18R1     | interleukin 18 receptor 1                                   | 1.10962834 |
| AL832081  | ZNF131     | zinc finger protein 131                                     | 1.10900954 |
| AA994334  | BCL10      | B-cell CLL/lymphoma 10                                      | 1.10817552 |
| NM_001616 | ACVR2A     | activin A receptor, type IIA                                | 1.1064223  |
| NM_004527 | MEOX1      | mesenchyme homeobox 1                                       | 1.10486457 |
| AI949827  | NFE2L3     | nuclear factor (erythroid-derived 2)-like 3                 | 1.10182886 |
| AK091504  | SFXN3      | sideroflexin 3                                              | 1.10123168 |
| AI435248  | SFRS4      | splicing factor, arginine/serine-rich 4                     | 1.09788396 |
| AU147899  | B2M        | beta-2-microglobulin                                        | 1.09571862 |
| AA504356  | PCBP2      | poly(rC) binding protein 2                                  | 1.09206066 |
| BE646398  | MYO1G      | myosin IG                                                   | 1.09085471 |
| NM_022083 | FAM129A    | family with sequence similarity 129, member A               | 1.08944272 |
| AW361702  | PSMD7      | proteasome (prosome, macropain) 26S subunit, non-ATP-       | 1.08898631 |
| BF725121  | SKIL       | SKI-like oncogene                                           | 1.08704229 |
| BC010948  | ATXN1      | ataxin 1                                                    | 1.08568744 |
| BF973568  | SELM       | selenoprotein M                                             | 1.0847604  |
| NM_016061 | YPEL5      | yippee-like 5 (Drosophila)                                  | 1.0831084  |
| AA669336  | COCH       | coagulation factor C homolog, cochlin (Limulus polyphemus   | 1.08105049 |
| AI916528  | CYP4V2     | cytochrome P450, family 4, subfamily V, polypeptide 2       | 1.07661865 |
| NM_001558 | IL10RA     | interleukin 10 receptor, alpha                              | 1.07201362 |
| NM_006566 | CD226      | CD226 molecule                                              | 1.06845226 |
| NM_025105 | NGLY1      | N-glycanase 1                                               | 1.06758597 |
| AI041854  | SFRS15     | splicing factor, arginine/serine-rich 15                    | 1.06564608 |
| M23254    | CAPN2      | calpain 2, (m/II) large subunit                             | 1.06055373 |
| X16354    | CEACAM1    | carcinoembryonic antigen-related cell adhesion molecule     | 1.06023253 |



|           |           |                                                              |            |
|-----------|-----------|--------------------------------------------------------------|------------|
| NM_005738 | ARL4A     | ADP-ribosylation factor-like 4A                              | 1.05802608 |
| NM_001924 | GADD45A   | growth arrest and DNA-damage-inducible, alpha                | 1.05583676 |
| AI301948  | ENTPD1    | ectonucleoside triphosphate diphosphohydrolase 1             | 1.05015722 |
| NM_003473 | STAM      | signal transducing adaptor molecule (SH3 domain and ITA      | 1.04963627 |
| AA903184  | DDX50     | DEAD (Asp-Glu-Ala-Asp) box polypeptide 50                    | 1.04898691 |
| AW438464  | GOLGA4    | golgin A4                                                    | 1.04573533 |
| BE220399  | C19orf43  | chromosome 19 open reading frame 43                          | 1.04321216 |
| AF147782  | ETV7      | ets variant 7                                                | 1.04074238 |
| NM_004403 | DFNA5     | deafness, autosomal dominant 5                               | 1.04036401 |
| AA223204  | LOC442113 | similar to protein tyrosine phosphatase, non-receptor type   | 1.04001021 |
| AW241752  | SFRS11    | splicing factor, arginine/serine-rich 11                     | 1.0389254  |
| AL136621  | ZMYM2     | zinc finger, MYM-type 2                                      | 1.03827635 |
| NM_000880 | IL7       | interleukin 7                                                | 1.03804066 |
| AA468591  | CLK4      | CDC-like kinase 4                                            | 1.02635143 |
| BI868311  | ARF1      | ADP-ribosylation factor 1                                    | 1.02150658 |
| W74622    | SAMD4B    | sterile alpha motif domain containing 4B                     | 1.02040599 |
| BC002646  | JUN       | jun oncogene                                                 | 1.01443663 |
| AW165960  | PTP4A1    | protein tyrosine phosphatase type IVA, member 1              | 1.0138522  |
| BC039019  | ST8SIA1   | ST8 alpha-N-acetyl-neuraminide alpha-2,8-sialyltransferase   | 1.01226112 |
| AU122448  | U2AF1     | U2 small nuclear RNA auxiliary factor 1                      | 1.00980915 |
| NM_024770 | METTL8    | methyltransferase like 8                                     | 1.00916129 |
| AA428240  | RBMS3     | RNA binding motif, single stranded interacting protein       | 1.00638132 |
| AI880383  | NKTR      | natural killer-tumor recognition sequence                    | 1.00500215 |
| AW572402  | RNF34     | ring finger protein 34                                       | 1.00491187 |
| NM_002502 | NFKB2     | nuclear factor of kappa light polypeptide gene enhancer in   | 1.00035606 |
| NM_002569 | FURIN     | furin (paired basic amino acid cleaving enzyme)              | -1.0040349 |
| S67779    | BCL6      | B-cell CLL/lymphoma 6                                        | -1.0094795 |
| NM_023009 | MARCKSL1  | MARCKS-like 1                                                | -1.0145132 |
| NM_001877 | CR2       | complement component (3d/Epstein Barr virus) receptor :      | -1.0240391 |
| AF043294  | BUB1      | budding uninhibited by benzimidazoles 1 homolog (yeast)      | -1.0432715 |
| BG482805  | IGKV4-1   | immunoglobulin kappa variable 4-1                            | -1.0473336 |
| AF069506  | RASD1     | RAS, dexamethasone-induced 1                                 | -1.0503401 |
| AF027205  | SPINT2    | serine peptidase inhibitor, Kunitz type, 2                   | -1.0551359 |
| BG107456  | SERTAD2   | SERTA domain containing 2                                    | -1.0685495 |
| BE856336  | FAM167A   | family with sequence similarity 167, member A                | -1.0818577 |
| BG290193  | ZNF703    | zinc finger protein 703                                      | -1.0850986 |
| NM_021978 | ST14      | suppression of tumorigenicity 14 (colon carcinoma)           | -1.0950844 |
| X87344    | HLA-DQB2  | major histocompatibility complex, class II, DQ beta 2        | -1.0951574 |
| NM_006472 | TXNIP     | thioredoxin interacting protein                              | -1.0969601 |
| AF349314  | PNO1      | partner of NOB1 homolog (S. cerevisiae)                      | -1.103313  |
| K01144    | CD74      | CD74 molecule, major histocompatibility complex, class II    | -1.1067794 |
| AW193600  | LOC439949 | hypothetical protein LOC439949                               | -1.1465382 |
| NM_021913 | AXL       | AXL receptor tyrosine kinase                                 | -1.1796733 |
| NM_006344 | CLEC10A   | C-type lectin domain family 10, member A                     | -1.2016088 |
| U96394    | IGLV1-44  | immunoglobulin lambda variable 1-44                          | -1.2108348 |
| AW474158  | ZNF528    | zinc finger protein 528                                      | -1.2135818 |
| NM_017412 | FZD3      | frizzled homolog 3 (Drosophila)                              | -1.2143797 |
| NM_017911 | FAM118A   | family with sequence similarity 118, member A                | -1.2355816 |
| AL022324  | IGLL3     | immunoglobulin lambda-like polypeptide 3                     | -1.2392333 |
| NM_006140 | CSF2RA    | colony stimulating factor 2 receptor, alpha, low-affinity (g | -1.242612  |
| NM_005461 | MAFB      | v-maf musculoaponeurotic fibrosarcoma oncogene homolog       | -1.2470962 |
| U65590    | IL1RN     | interleukin 1 receptor antagonist                            | -1.2478804 |
| AK001782  | CXXC5     | CXXC finger 5                                                | -1.2525229 |

|           |          |                                                       |            |
|-----------|----------|-------------------------------------------------------|------------|
| NM_005032 | PLS3     | plastin 3                                             | -1.2608962 |
| NM_014454 | SESN1    | sestrin 1                                             | -1.2997153 |
| NM_016184 | CLEC4A   | C-type lectin domain family 4, member A               | -1.3114478 |
| AV734646  | FAM26F   | family with sequence similarity 26, member F          | -1.3136746 |
| NM_006235 | POU2AF1  | POU class 2 associating factor 1                      | -1.3269469 |
| AW264102  | FAM43A   | family with sequence similarity 43, member A          | -1.3290174 |
| AW299729  | CDKL2    | cyclin-dependent kinase-like 2 (CDC2-related kinase)  | -1.3393427 |
| BE139156  | CASP2    | caspase 2, apoptosis-related cysteine peptidase       | -1.358683  |
| NM_018384 | GIMAP5   | GTPase, IMAP family member 5                          | -1.3696036 |
| NM_004817 | TJP2     | tight junction protein 2 (zona occludens 2)           | -1.3739247 |
| NM_019058 | DDIT4    | DNA-damage-inducible transcript 4                     | -1.3823462 |
| U58515    | CHI3L2   | chitinase 3-like 2                                    | -1.3906416 |
| NM_021803 | IL21     | interleukin 21                                        | -1.4107762 |
| AI984221  | COL5A3   | collagen, type V, alpha 3                             | -1.4198621 |
| BC003576  | ACTN1    | actinin, alpha 1                                      | -1.4220032 |
| AJ417079  | RARA     | retinoic acid receptor, alpha                         | -1.4241499 |
| NM_004833 | AIM2     | absent in melanoma 2                                  | -1.430941  |
| NM_002356 | MARCKS   | myristoylated alanine-rich protein kinase C substrate | -1.4603311 |
| NM_012072 | CD93     | CD93 molecule                                         | -1.4628738 |
| NM_002426 | MMP12    | matrix metalloproteinase 12 (macrophage elastase)     | -1.4674305 |
| NM_004369 | COL6A3   | collagen, type VI, alpha 3                            | -1.5021633 |
| AL561834  | TOP2A    | topoisomerase (DNA) II alpha 170kDa                   | -1.5581727 |
| NM_002029 | FPR1     | formyl peptide receptor 1                             | -1.5668204 |
| NM_004390 | CTSH     | cathepsin H                                           | -1.5888332 |
| L35594    | ENPP2    | ectonucleotide pyrophosphatase/phosphodiesterase 2    | -1.6218432 |
| M60333    | HLA-DRA  | major histocompatibility complex, class II, DR alpha  | -1.6409029 |
| NM_012338 | TSPAN12  | tetraspanin 12                                        | -1.6509415 |
| NM_002110 | HCK      | hemopoietic cell kinase                               | -1.6590607 |
| N66633    | LHFPL2   | lipoma HMGIC fusion partner-like 2                    | -1.7109757 |
| NM_002583 | PAWR     | PRKC, apoptosis, WT1, regulator                       | -1.7260365 |
| AA282495  | C12orf32 | chromosome 12 open reading frame 32                   | -1.7330491 |
| NM_005195 | CEBPD    | CCAAT/enhancer binding protein (C/EBP), delta         | -1.7546549 |
| NM_000177 | GSN      | gelsolin (amyloidosis, Finnish type)                  | -1.7612447 |
| AL040198  | HEYL     | hairy/enhancer-of-split related with YRPW motif-like  | -1.8011696 |
| NM_002432 | MNDA     | myeloid cell nuclear differentiation antigen          | -1.8427189 |
| M34455    | IDO1     | indoleamine 2,3-dioxygenase 1                         | -1.8464771 |
| NM_018402 | IL26     | interleukin 26                                        | -1.8939336 |
| AK025298  | AUTS2    | autism susceptibility candidate 2                     | -1.8976307 |
| NM_006498 | LGALS2   | lectin, galactoside-binding, soluble, 2               | -1.9330548 |
| BG485135  | IGKC     | immunoglobulin kappa constant                         | -1.9496626 |
| NM_006332 | IFI30    | interferon, gamma-inducible protein 30                | -1.9950294 |
| NM_004591 | CCL20    | chemokine (C-C motif) ligand 20                       | -2.0027129 |
| NM_031311 | CPVL     | carboxypeptidase, vitellogenic-like                   | -2.0138691 |
| NM_001775 | CD38     | CD38 molecule                                         | -2.0209288 |
| AF228422  | C15orf48 | chromosome 15 open reading frame 48                   | -2.0396485 |
| NM_005345 | HSPA1A   | heat shock 70kDa protein 1A                           | -2.0607916 |
| NM_000690 | ALDH2    | aldehyde dehydrogenase 2 family (mitochondrial)       | -2.0859511 |
| NM_012258 | HEY1     | hairy/enhancer-of-split related with YRPW motif 1     | -2.0924606 |
| NM_014398 | LAMP3    | lysosomal-associated membrane protein 3               | -2.0997785 |
| NM_016081 | PALLD    | palladin, cytoskeletal associated protein             | -2.1876794 |
| AL567411  | CDK5R1   | cyclin-dependent kinase 5, regulatory subunit 1 (p35) | -2.4577767 |
| M87790    | IGL@     | immunoglobulin lambda locus                           | -2.5257209 |
| NM_001819 | CHGB     | chromogranin B (secretogranin 1)                      | -2.58262   |

|           |       |                                      |            |
|-----------|-------|--------------------------------------|------------|
| NM_002286 | LAG3  | lymphocyte-activation gene 3         | -2.6840389 |
| NM_002155 | HSPA6 | heat shock 70kDa protein 6 (HSP70B') | -2.9177319 |
| NM_003956 | CH25H | cholesterol 25-hydroxylase           | -3.0745672 |
| Z58820    | IL17A | interleukin 17A                      | -3.9434995 |

### Dysregulated genes in CD8 TILs

| AGI       | Gene symbol | Gene Name                                                                    | log2 FC |
|-----------|-------------|------------------------------------------------------------------------------|---------|
| NM_006419 | CXCL13      | chemokine (C-X-C motif) ligand 13                                            | 5.192   |
| NM_002674 | PMCH        | pro-melanin-concentrating hormone                                            | 4.67374 |
| AU147399  | CAV1        | caveolin 1, caveolae protein, 22kDa                                          | 4.6688  |
| AL519710  | CADM1       | cell adhesion molecule 1                                                     | 4.2355  |
| BE881590  | ETV1        | ets variant 1                                                                | 4.12124 |
| BF673779  | TMEM155     | transmembrane protein 155                                                    | 3.8895  |
| NM_024508 | ZBED2       | zinc finger, BED-type containing 2                                           | 3.77262 |
| NM_001561 | TNFRSF9     | tumor necrosis factor receptor superfamily, member 9                         | 3.6985  |
| NM_001078 | VCAM1       | vascular cell adhesion molecule 1                                            | 3.63308 |
| NM_003633 | ENC1        | ectodermal-neural cortex (with BTB-like domain)                              | 3.4234  |
| AI800110  | SGPP2       | sphingosine-1-phosphate phosphatase 2                                        | 3.36127 |
| NM_025195 | TRIB1       | tribbles homolog 1 (Drosophila)                                              | 3.34527 |
| AB014511  | ATP9A       | ATPase, class II, type 9A                                                    | 3.33856 |
| AA211909  | TOX2        | TOX high mobility group box family member 2                                  | 3.23703 |
| AV713062  | MAP3K8      | mitogen-activated protein kinase kinase 8                                    | 3.17996 |
| BC001638  | ASCL1       | achaete-scute complex homolog 1 (Drosophila)                                 | 3.09609 |
| AA873350  | NAMPT       | nicotinamide phosphoribosyltransferase                                       | 3.07749 |
| L21181    | ICA1        | islet cell autoantigen 1, 69kDa                                              | 3.06955 |
| AI857639  | PCAI1P1     | phorbol-12-myristate-13-acetate-induced protein 1                            | 3.02013 |
| AL514445  | RGS4        | regulator of G-protein signaling 4                                           | 3.00727 |
| NM_001394 | DUSP4       | dual specificity phosphatase 4                                               | 2.98301 |
| H99792    | GNB4        | guanine nucleotide binding protein (G protein), beta polypeptide 4           | 2.97665 |
| AI935096  | NR4A2       | nuclear receptor subfamily 4, group A, member 2                              | 2.96055 |
| AW150720  | RDH10       | retinol dehydrogenase 10 (all-trans)                                         | 2.91471 |
| NM_000305 | PON2        | paraoxonase 2                                                                | 2.91456 |
| AL046017  | FAM46C      | family with sequence similarity 46, member C                                 | 2.86917 |
| AV683684  | RPS27       | ribosomal protein S27                                                        | 2.80697 |
| AF063591  | CD200       | CD200 molecule                                                               | 2.75053 |
| AK026714  | PELL1       | pellino homolog 1 (Drosophila)                                               | 2.71535 |
| U90273    | CTLA4       | cytotoxic T-lymphocyte-associated protein 4                                  | 2.66468 |
| NM_000170 | GLDC        | glycine dehydrogenase (decarboxylating)                                      | 2.64799 |
| NM_022367 | SEMA4A      | sema domain, immunoglobulin domain (Ig), transmembrane domain (TM) and shc   | 2.62715 |
| NM_016533 | NINJ2       | ninjurin 2                                                                   | 2.57526 |
| BE674528  | MAF         | v-maf musculoaponeurotic fibrosarcoma oncogene homolog (avian)               | 2.55646 |
| BF339445  | CHN1        | chimerin (chimaerin) 1                                                       | 2.5553  |
| NM_003326 | TNFSF4      | tumor necrosis factor (ligand) superfamily, member 4                         | 2.53871 |
| AA470369  | C6orf105    | chromosome 6 open reading frame 105                                          | 2.46545 |
| NM_021963 | NAP1L2      | nucleosome assembly protein 1-like 2                                         | 2.42185 |
| BC003143  | DUSP6       | dual specificity phosphatase 6                                               | 2.36173 |
| M17565    | HLA-DQB1    | major histocompatibility complex, class II, DQ beta 1                        | 2.35728 |
| AK025615  | BCAT1       | branched chain aminotransferase 1, cytosolic                                 | 2.34017 |
| NM_018988 | GFOD1       | glucose-fructose oxidoreductase domain containing 1                          | 2.32779 |
| BF701166  | TRPS1       | trichorhinophalangeal syndrome 1                                             | 2.30289 |
| NM_022162 | NO2D        | nucleotide-binding oligomerization domain containing 2                       | 2.30067 |
| AA156721  | ALCAM       | activated leukocyte cell adhesion molecule                                   | 2.29275 |
| N52572    | LOC285812   | hypothetical protein LOC285812                                               | 2.28217 |
| U12767    | NR4A3       | nuclear receptor subfamily 4, group A, member 3                              | 2.25821 |
| NM_002664 | PLEK        | pleckstrin                                                                   | 2.23815 |
| AK026181  | PHLDA1      | pleckstrin homology-like domain, family A, member 1                          | 2.23258 |
| BF446578  | RASGEF1A    | RasGEF domain family, member 1A                                              | 2.22719 |
| AF045452  | NAB1        | NGFI-A binding protein 1 (EGR1 binding protein 1)                            | 2.2204  |
| AA873600  | SMPDL3A     | sphingomyelin phosphodiesterase, acid-like 3A                                | 2.21534 |
| AI022882  | PAM         | peptidylglycine alpha-amidating monooxygenase                                | 2.19245 |
| U84744    | LYST        | lysosomal trafficking regulator                                              | 2.17376 |
| AI961231  | TOX         | thymocyte selection-associated high mobility group box                       | 2.17002 |
| NM_014914 | AGAP1       | ArfGAP with GTPase domain, ankyrin repeat and PH domain 1                    | 2.16208 |
| NM_003670 | BHLHE40     | basic helix-loop-helix family, member e40                                    | 2.15248 |
| N47315    | PACSIN1     | protein kinase C and casein kinase substrate in neurons 1                    | 2.14487 |
| NM_002847 | PTPRN2      | protein tyrosine phosphatase, receptor type, N polypeptide 2                 | 2.12151 |
| AI916948  | STX11       | syntaxin 11                                                                  | 2.1203  |
| BC039019  | ST8SIA1     | ST8 alpha-N-acetylneuraminide alpha-2,8-sialyltransferase 1                  | 2.10855 |
| AA806965  | BTNL9       | butyrophilin-like 9                                                          | 2.10694 |
| AA828049  | YME1L1      | YME1-like 1 (S. cerevisiae)                                                  | 2.09272 |
| BF340083  | SLC1A4      | solute carrier family 1 (glutamate/neutral amino acid transporter), member 4 | 2.09183 |
| AW243081  | CRIM1       | cysteine rich transmembrane BMP regulator 1 (chordin-like)                   | 2.08278 |
| AI565067  | KIAA1324    | KIAA1324                                                                     | 2.06017 |
| AI681917  | IRX3        | iroquois homeobox 3                                                          | 2.05937 |
| M27487    | HLA-DPA1    | major histocompatibility complex, class II, DP alpha 1                       | 2.0536  |
| AU155361  | NEAT1       | nuclear paraspeckle assembly transcript 1 (non-protein coding)               | 2.04769 |
| NM_002286 | LAG3        | lymphocyte-activation gene 3                                                 | 2.04412 |
| AI671885  | SLC20A1     | solute carrier family 20 (phosphate transporter), member 1                   | 2.04364 |
| AA551142  | PHACTR2     | phosphatase and actin regulator 2                                            | 2.04026 |
| AL554008  | GPR56       | G protein-coupled receptor 56                                                | 2.0311  |
| NM_000572 | IL10        | interleukin 10                                                               | 2.02592 |

|           |           |                                                                                     |         |
|-----------|-----------|-------------------------------------------------------------------------------------|---------|
| NM_014747 | RIMS3     | regulating synaptic membrane exocytosis 3                                           | 2.01224 |
| AW264102  | FAM43A    | family with sequence similarity 43, member A                                        | 2.01075 |
| U16996    | DUSP5     | dual specificity phosphatase 5                                                      | 2.00561 |
| NM_000043 | FAS       | Fas (TNF receptor superfamily, member 6)                                            | 2.00521 |
| AL541655  | TMEM49    | transmembrane protein 49                                                            | 1.99981 |
| AK002064  | SPATS2L   | spermatogenesis associated, serine-rich 2-like                                      | 1.9956  |
| AA580082  | GSPT1     | G1 to S phase transition 1                                                          | 1.98713 |
| AW512550  | TIGIT     | T cell immunoreceptor with Ig and ITIM domains                                      | 1.98634 |
| NM_000399 | EGR2      | early growth response 2                                                             | 1.9778  |
| AI692659  | PRDM1     | PR domain containing 1, with ZNF domain                                             | 1.97392 |
| AA769986  | NUPL1     | nucleoporin like 1                                                                  | 1.96565 |
| N36770    | DUSP10    | dual specificity phosphatase 10                                                     | 1.94867 |
| BE247450  | CHD2      | chromodomain helicase DNA binding protein 2                                         | 1.94488 |
| NM_005261 | GEM       | GTP binding protein overexpressed in skeletal muscle                                | 1.93466 |
| AW290956  | NDFIP2    | Nedd4 family interacting protein 2                                                  | 1.92701 |
| AI937080  | C14orf145 | chromosome 14 open reading frame 145                                                | 1.91431 |
| NM_021077 | NMB       | neuromedin B                                                                        | 1.89455 |
| AA741493  | ZFAND6    | zinc finger, AN1-type domain 6                                                      | 1.89004 |
| AB018009  | SLC7A5    | solute carrier family 7 (cationic amino acid transporter, y+ system), member 5      | 1.88925 |
| AI559701  | HNRPLL    | heterogeneous nuclear ribonucleoprotein L-like                                      | 1.8889  |
| AA019893  | SNAP47    | synaptosomal-associated protein, 47kDa                                              | 1.88535 |
| AW235612  | ATXN1     | ataxin 1                                                                            | 1.87947 |
| AL110164  | LIMS1     | LIM and senescent cell antigen-like domains 1                                       | 1.86377 |
| AL109824  | TP53INP2  | tumor protein p53 inducible nuclear protein 2                                       | 1.86131 |
| NM_001066 | TNFRSF1B  | tumor necrosis factor receptor superfamily, member 1B                               | 1.85344 |
| NM_004485 | GNG4      | guanine nucleotide binding protein (G protein), gamma 4                             | 1.85096 |
| NM_001444 | FABP5     | fatty acid binding protein 5 (psoriasis-associated)                                 | 1.84424 |
| AK027071  | TSC2D1    | TSC22 domain family, member 1                                                       | 1.83887 |
| AA626780  | SYT11     | synaptotagmin XI                                                                    | 1.83591 |
| AI208342  | DCAF8     | DDB1 and CUL4 associated factor 8                                                   | 1.81815 |
| NM_006235 | POU2AF1   | POU class 2 associating factor 1                                                    | 1.80659 |
| AI810244  | RILPL2    | Rab interacting lysosomal protein-like 2                                            | 1.79323 |
| NM_004867 | ITM2A     | integral membrane protein 2A                                                        | 1.79219 |
| AU146891  | SMAD1     | SMAD family member 1                                                                | 1.79085 |
| BC025250  | METTL8    | methyltransferase like 8                                                            | 1.79049 |
| AF065389  | TFSPAN5   | tetraspanin 5                                                                       | 1.79007 |
| AW085505  | AFF3      | AF4/FMR2 family, member 3                                                           | 1.78983 |
| NM_001154 | ANXA5     | annexin A5                                                                          | 1.78682 |
| BE439987  | GAS7      | growth arrest-specific 7                                                            | 1.7813  |
| D38122    | FASLG     | Fas ligand (TNF superfamily, member 6)                                              | 1.75508 |
| W96225    | CD44      | CD44 molecule (Indian blood group)                                                  | 1.74848 |
| NM_000712 | BLVRA     | biliverdin reductase A                                                              | 1.74314 |
| AF450243  | HAVCR2    | hepatitis A virus cellular receptor 2                                               | 1.74132 |
| NM_000611 | CD59      | CD59 molecule, complement regulatory protein                                        | 1.72069 |
| NM_000237 | LPL       | lipoprotein lipase                                                                  | 1.70641 |
| AI872284  | ASB2      | ankyrin repeat and SOCS box-containing 2                                            | 1.7034  |
| AK026900  | PPP1R16B  | protein phosphatase 1, regulatory (inhibitor) subunit 16B                           | 1.67881 |
| M60333    | HLA-DRA   | major histocompatibility complex, class II, DR alpha                                | 1.66871 |
| NM_152641 | ARID2     | AT rich interactive domain 2 (ARID, RFX-like)                                       | 1.66598 |
| NM_002121 | HLA-DPB1  | major histocompatibility complex, class II, DP beta 1                               | 1.65709 |
| AJ271869  | SLAMF7    | SLAM family member 7                                                                | 1.65497 |
| NM_002475 | MYL6B     | myosin, light chain 6B, alkali, smooth muscle and non-muscle                        | 1.64738 |
| NM_016285 | KLF12     | Kruppel-like factor 12                                                              | 1.64502 |
| AK000168  | CD24      | CD24 molecule                                                                       | 1.64434 |
| AI339710  | FAM108C1  | family with sequence similarity 108, member C1                                      | 1.639   |
| AI420319  | SERP2     | stress-associated endoplasmic reticulum protein family member 2                     | 1.63145 |
| BC004371  | APLP2     | amyloid beta (A4) precursor-like protein 2                                          | 1.6296  |
| AA215701  | SNORA28   | small nucleolar RNA, H/ACA box 28                                                   | 1.62287 |
| AK056852  | LOC144571 | hypothetical protein LOC144571                                                      | 1.62089 |
| BE675139  | CREB3L2   | cAMP responsive element binding protein 3-like 2                                    | 1.6173  |
| AA250935  | LPXN      | leupaxin                                                                            | 1.61531 |
| AB023135  | ICOS      | inducible T-cell co-stimulator                                                      | 1.60998 |
| AW157571  | JAKMIP1   | janus kinase and microtubule interacting protein 1                                  | 1.60753 |
| AI091372  | CSRNP1    | cysteine-serine-rich nuclear protein 1                                              | 1.60698 |
| BF739885  | SETBP1    | SET binding protein 1                                                               | 1.60499 |
| NM_021995 | UTS2      | urotensin 2                                                                         | 1.59971 |
| BC009205  | C6orf114  | chromosome 6 open reading frame 114                                                 | 1.59368 |
| BC038440  | GALNT1    | UDP-N-acetyl-alpha-D-galactosamine: polypeptide N-acetylgalactosaminyltransferase 1 | 1.59159 |
| AF125393  | RAB27A    | RAB27A, member RAS oncogene family                                                  | 1.58257 |
| AA813332  | DFNB31    | deafness, autosomal recessive 31                                                    | 1.57924 |
| AL833750  | SYTL3     | synaptotagmin-like 3                                                                | 1.57757 |
| NM_006399 | BATF      | basic leucine zipper transcription factor, ATF-like                                 | 1.57392 |
| BF001714  | CPT1A     | carnitine palmitoyltransferase 1A (liver)                                           | 1.56721 |
| AI809325  | GTSF1L    | gametocyte specific factor 1-like                                                   | 1.56358 |
| AW438464  | GOLGA4    | golgin A4                                                                           | 1.56244 |
| NM_025151 | RAB11FIP1 | RAB11 family interacting protein 1 (class I)                                        | 1.55677 |

|           |              |                                                                             |         |
|-----------|--------------|-----------------------------------------------------------------------------|---------|
| AA504356  | PCBP2        | poly(rC) binding protein 2                                                  | 1.55536 |
| AW242297  | MAP7         | microtubule-associated protein 7                                            | 1.54566 |
| AA935633  | QKI          | quaking homolog, KH domain RNA binding (mouse)                              | 1.54515 |
| AU147899  | B2M          | beta-2-microglobulin                                                        | 1.543   |
| AA262583  | LRRFIP1      | leucine rich repeat (in FLII) interacting protein 1                         | 1.53836 |
| NM_021983 | HLA-DRB4     | major histocompatibility complex, class II, DR beta 4                       | 1.53828 |
| NM_002984 | CCL4         | chemokine (C-C motif) ligand 4                                              | 1.53367 |
| NM_003234 | TFRC         | transferrin receptor (p90, CD71)                                            | 1.52032 |
| NM_001613 | ACTA2        | actin, alpha 2, smooth muscle, aorta                                        | 1.51754 |
| BE046511  | FNBP1        | formin binding protein 1                                                    | 1.51752 |
| AI760495  | CYCS         | cytochrome c, somatic                                                       | 1.51663 |
| AF070569  | C17orf91     | chromosome 17 open reading frame 91                                         | 1.51549 |
| BF514079  | KLF4         | Kruppel-like factor 4 (gut)                                                 | 1.51481 |
| AI826881  | CTNNA1       | catenin (cadherin-associated protein), alpha 1, 102kDa                      | 1.51221 |
| AL037917  | MALAT1       | metastasis associated lung adenocarcinoma transcript 1 (non-protein coding) | 1.50791 |
| R43202    | AKAP5        | A kinase (PRKA) anchor protein 5                                            | 1.49997 |
| AL047052  | LOC100190986 | hypothetical LOC100190986                                                   | 1.4999  |
| BF244402  | FBXO32       | F-box protein 32                                                            | 1.49841 |
| NM_000647 | CCR2         | chemokine (C-C motif) receptor 2                                            | 1.49261 |
| AW973232  | NCRNA00182   | non-protein coding RNA 182                                                  | 1.49132 |
| AI830331  | KDM6B        | lysine (K)-specific demethylase 6B                                          | 1.4877  |
| NM_002133 | HMOX1        | heme oxygenase (decycling) 1                                                | 1.48767 |
| BF111651  | PPAPDC1B     | phosphatidic acid phosphatase type 2 domain containing 1B                   | 1.4866  |
| M29383    | IFNG         | interferon, gamma                                                           | 1.48199 |
| BE299456  | C16orf45     | chromosome 16 open reading frame 45                                         | 1.47793 |
| AI819150  | ASXL1        | additional sex combs like 1 (Drosophila)                                    | 1.47121 |
| D14826    | CREM         | cAMP responsive element modulator                                           | 1.47079 |
| NM_004360 | CDH1         | cadherin 1, type 1, E-cadherin (epithelial)                                 | 1.46955 |
| NM_018413 | CHST11       | carbohydrate (chondroitin 4) sulfotransferase 11                            | 1.46912 |
| BC042665  | CD80         | CD80 molecule                                                               | 1.46883 |
| NM_002923 | RGS2         | regulator of G-protein signaling 2, 24kDa                                   | 1.4634  |
| NM_003811 | TNFSF9       | tumor necrosis factor (ligand) superfamily, member 9                        | 1.46236 |
| AA828371  | VPS13C       | vacuolar protein sorting 13 homolog C (S. cerevisiae)                       | 1.45718 |
| AV726956  | BEX5         | brain expressed, X-linked 5                                                 | 1.45523 |
| BG231494  | METRNL       | meteorin, glial cell differentiation regulator-like                         | 1.45093 |
| AW293441  | SQSTM1       | sequestosome 1                                                              | 1.44079 |
| AW237307  | CLECL1       | C-type lectin-like 1                                                        | 1.43894 |
| AI263909  | RHOB         | ras homolog gene family, member B                                           | 1.43544 |
| AF050145  | IDS          | iduronate 2-sulfatase                                                       | 1.43294 |
| AA007424  | LOC6444656   | hypothetical protein LOC6444656                                             | 1.43107 |
| NM_021603 | FXYD2        | FXYD domain containing ion transport regulator 2                            | 1.42949 |
| AI768512  | WNK1         | WNK lysine deficient protein kinase 1                                       | 1.42943 |
| U58515    | CHI3L2       | chitinase 3-like 2                                                          | 1.42683 |
| AI263819  | SRGAP2       | SLIT-ROBO Rho GTPase activating protein 2                                   | 1.42413 |
| NM_000575 | IL1A         | interleukin 1, alpha                                                        | 1.42031 |
| AA872471  | SNRPA1       | small nuclear ribonucleoprotein polypeptide A'                              | 1.41388 |
| AA805939  | REV3L        | REV3-like, catalytic subunit of DNA polymerase zeta (yeast)                 | 1.41285 |
| BF446719  | WIPF1        | WAS/WASL interacting protein family, member 1                               | 1.39244 |
| NM_020179 | C11orf75     | chromosome 11 open reading frame 75                                         | 1.39108 |
| AV713773  | MCOLN2       | mucolipin 2                                                                 | 1.38471 |
| BC005022  | SNX9         | sorting nexin 9                                                             | 1.38373 |
| NM_002922 | RGS1         | regulator of G-protein signaling 1                                          | 1.3835  |
| AF130079  | PRO2852      | hypothetical protein PRO2852                                                | 1.38342 |
| NM_005780 | LHFP         | lipoma HMGIC fusion partner                                                 | 1.38288 |
| AL834350  | PPP2R5C      | protein phosphatase 2, regulatory subunit B', gamma isoform                 | 1.38129 |
| NM_001779 | CD58         | CD58 molecule                                                               | 1.38075 |
| AI936531  | SFRS18       | splicing factor, arginine/serine-rich 18                                    | 1.37935 |
| AA742596  | RBM6         | RNA binding motif protein 6                                                 | 1.37755 |
| NM_003272 | GPR137B      | G protein-coupled receptor 137B                                             | 1.37694 |
| NM_173648 | CDCDC141     | coiled-coil domain containing 141                                           | 1.37504 |
| NM_004219 | PTTG1        | pituitary tumor-transforming 1                                              | 1.3719  |
| D64109    | TOB2         | transducer of ERBB2, 2                                                      | 1.36698 |
| NM_014800 | ELMO1        | engulfment and cell motility 1                                              | 1.3663  |
| AA468591  | CLK4         | CDC-like kinase 4                                                           | 1.36121 |
| AA807529  | MCM5         | minichromosome maintenance complex component 5                              | 1.3602  |
| BE646414  | GGA2         | golgi-associated, gamma adaptin ear containing, ARF binding protein 2       | 1.35834 |
| AI692879  | DLG1         | discs, large homolog 1 (Drosophila)                                         | 1.35731 |
| AL574435  | B4GALT1      | UDP-Gal:betaGlcNAc beta 1,4- galactosyltransferase, polypeptide 1           | 1.35184 |
| NM_002460 | IRF4         | interferon regulatory factor 4                                              | 1.35146 |
| NM_025105 | NGLY1        | N-glycanase 1                                                               | 1.34825 |
| BF576458  | NCOA1        | nuclear receptor coactivator 1                                              | 1.34751 |
| BE464843  | SR140        | U2-associated SR140 protein                                                 | 1.34522 |
| NM_015895 | GMNN         | geminin, DNA replication inhibitor                                          | 1.34442 |
| NM_001716 | CXCR5        | chemokine (C-X-C motif) receptor 5                                          | 1.3375  |
| AF031824  | CST7         | cystatin F (leukocystatin)                                                  | 1.3363  |
| AW276078  | LOC387763    | hypothetical protein LOC387763                                              | 1.33619 |

|           |               |                                                                               |         |
|-----------|---------------|-------------------------------------------------------------------------------|---------|
| BG231961  | MIR155HG      | MIR155 host gene (non-protein coding)                                         | 1.33305 |
| NM_000594 | TNF           | tumor necrosis factor (TNF superfamily, member 2)                             | 1.32983 |
| AB029316  | RNF19A        | ring finger protein 19A                                                       | 1.3292  |
| AL050378  | DKFZP586I1420 | hypothetical protein DKFZp586I1420                                            | 1.32834 |
| NM_001908 | CTSB          | cathepsin B                                                                   | 1.32677 |
| NM_018639 | WSB2          | WD repeat and SOCS box-containing 2                                           | 1.32586 |
| NM_003740 | KCNK5         | potassium channel, subfamily K, member 5                                      | 1.32022 |
| AA994334  | BCL10         | B-cell CLL/lymphoma 10                                                        | 1.31663 |
| AA715041  | MLL           | myeloid/lymphoid or mixed-lineage leukemia (trithorax homolog, Drosophila)    | 1.31459 |
| NM_014298 | QPRT          | quinolinate phosphoribosyltransferase                                         | 1.31401 |
| NM_002104 | GZMK          | granzyme K (granzyme 3; tryptase II)                                          | 1.31343 |
| AA223204  | LOC442113     | similar to protein tyrosine phosphatase, non-receptor type 11                 | 1.31233 |
| NM_000130 | F5            | coagulation factor V (proaccelerin, labile factor)                            | 1.311   |
| AK096036  | FLJ38717      | FLJ38717 protein                                                              | 1.30615 |
| AA448956  | CAMK2D        | calcium/calmodulin-dependent protein kinase II delta                          | 1.30449 |
| AL562860  | MBNL1         | muscleblind-like (Drosophila)                                                 | 1.30324 |
| BC000006  | ATP1B1        | ATPase, Na <sup>+</sup> /K <sup>+</sup> transporting, beta 1 polypeptide      | 1.29939 |
| AA584310  | CTHRC1        | collagen triple helix repeat containing 1                                     | 1.29792 |
| NM_005410 | SEPP1         | selenoprotein P, plasma, 1                                                    | 1.29773 |
| NM_004999 | MYO6          | myosin VI                                                                     | 1.29728 |
| AI765445  | BTG3          | BTG family, member 3                                                          | 1.295   |
| BC046241  | TRAPPC10      | trafficking protein particle complex 10                                       | 1.29445 |
| AI659561  | LRBA          | LPS-responsive vesicle trafficking, beach and anchor containing               | 1.29381 |
| U84246    | NEU1          | sialidase 1 (lysosomal sialidase)                                             | 1.29353 |
| BE676543  | ZCCHC2        | zinc finger, CCHC domain containing 2                                         | 1.28986 |
| AL136621  | ZMYM2         | zinc finger, MYM-type 2                                                       | 1.28782 |
| AW367507  | RAB18         | RAB18, member RAS oncogene family                                             | 1.28764 |
| BE544837  | PHF19         | PHD finger protein 19                                                         | 1.28757 |
| AK025272  | TAGAP         | T-cell activation RhoGTPase activating protein                                | 1.28569 |
| AI986192  | SERPINB9      | serpin peptidase inhibitor, clade B (ovalbumin), member 9                     | 1.28547 |
| NM_002245 | KCNK1         | potassium channel, subfamily K, member 1                                      | 1.28492 |
| AL831839  | DENND1B       | DENN/MADD domain containing 1B                                                | 1.282   |
| AV724325  | SAMD12        | sterile alpha motif domain containing 12                                      | 1.27285 |
| M28590    | CD74          | CD74 molecule, major histocompatibility complex, class II invariant chain     | 1.27007 |
| AI689935  | HBP1          | HMG-box transcription factor 1                                                | 1.26746 |
| AU120130  | LOC728153     | similar to FAM133B protein                                                    | 1.26727 |
| AI914323  | MIAT          | myocardial infarction associated transcript (non-protein coding)              | 1.26163 |
| NM_017522 | LRP8          | low density lipoprotein receptor-related protein 8, apolipoprotein e receptor | 1.26055 |
| AI239832  | UBE2D3        | ubiquitin-conjugating enzyme E2D 3 (UBC4/5 homolog, yeast)                    | 1.25986 |
| NM_005384 | FIL3          | nuclear factor, interleukin 3 regulated                                       | 1.25344 |
| NM_014661 | FAMS5B        | family with sequence similarity 53, member B                                  | 1.25257 |
| AK023140  | C3orf64       | chromosome 3 open reading frame 64                                            | 1.24708 |
| NM_022365 | DNAJC1        | DnaJ (Hsp40) homolog, subfamily C, member 1                                   | 1.24584 |
| NM_000540 | RYR1          | ryanodine receptor 1 (skeletal)                                               | 1.24581 |
| BF126155  | S100A10       | S100 calcium binding protein A10                                              | 1.24551 |
| NM_019886 | CHST7         | carbohydrate (N-acetylglucosamine 6-O) sulfotransferase 7                     | 1.24449 |
| NM_005231 | CTTN          | cortactin                                                                     | 1.24206 |
| BF981280  | MCL1          | myeloid cell leukemia sequence 1 (BCL2-related)                               | 1.24093 |
| AF100540  | SH2D1A        | SH2 domain protein 1A                                                         | 1.2396  |
| D13889    | ID1           | inhibitor of DNA binding 1, dominant negative helix-loop-helix protein        | 1.2394  |
| NM_022337 | RAB38         | RAB38, member RAS oncogene family                                             | 1.23893 |
| R15072    | SLC16A14      | solute carrier family 16, member 14 (monocarboxylic acid transporter 14)      | 1.23711 |
| AW978896  | TRA2A         | transformer 2 alpha homolog (Drosophila)                                      | 1.23685 |
| AA603041  | LOC150381     | hypothetical LOC150381                                                        | 1.23389 |
| AW275658  | HECTD1        | HECT domain containing 1                                                      | 1.23335 |
| NM_004311 | ARL3          | ADP-ribosylation factor-like 3                                                | 1.23246 |
| BF439282  | RAPGEF2       | Rap guanine nucleotide exchange factor (GEF) 2                                | 1.2322  |
| AF345567  | GPR174        | G protein-coupled receptor 174                                                | 1.22723 |
| BC028028  | STXBP3        | syntaxin binding protein 3                                                    | 1.22406 |
| L35594    | ENPP2         | ectonucleotide pyrophosphatase/phosphodiesterase 2                            | 1.22176 |
| NM_016448 | DTL           | denticleless homolog (Drosophila)                                             | 1.22006 |
| AK024341  | USP34         | ubiquitin specific peptidase 34                                               | 1.21936 |
| BF971873  | TMEM107       | transmembrane protein 107                                                     | 1.21803 |
| L48516    | PON3          | paraoxonase 3                                                                 | 1.21792 |
| BE964043  | SKP1          | S-phase kinase-associated protein 1                                           | 1.21769 |
| AA279462  | PRKRA         | protein kinase, interferon-inducible double stranded RNA dependent activator  | 1.21547 |
| BC000091  | ATG7          | ATG7 autophagy related 7 homolog ( <i>S. cerevisiae</i> )                     | 1.21477 |
| AA209239  | ABHD6         | abhydrolase domain containing 6                                               | 1.21373 |
| AK091504  | SFXN3         | sideroflexin 3                                                                | 1.21346 |
| AA748418  | MCTP2         | multiple C2 domains, transmembrane 2                                          | 1.21271 |
| AA657818  | TOX4          | TOX high mobility group box family member 4                                   | 1.21206 |
| NM_006599 | NFAT5         | nuclear factor of activated T-cells 5, tonicity-responsive                    | 1.21162 |
| N49935    | RASSF4        | Ras association (RalGDS/AF-6) domain family member 4                          | 1.20899 |
| AW361702  | PSMD7         | proteasome (prosome, macropain) 26S subunit, non-ATPase, 7                    | 1.20527 |
| M38083    | NAGA          | N-acetylgalactosaminidase, alpha-                                             | 1.20398 |
| BE676408  | HECA          | headcase homolog (Drosophila)                                                 | 1.2032  |

|           |          |                                                                             |         |
|-----------|----------|-----------------------------------------------------------------------------|---------|
| AW276914  | MBNL2    | muscleblind-like 2 (Drosophila)                                             | 1.20261 |
| NM_000376 | VDR      | vitamin D (1,25- dihydroxyvitamin D3) receptor                              | 1.19939 |
| NM_006763 | BTG2     | BTG family, member 2                                                        | 1.19526 |
| AI085338  | CASZ1    | castor zinc finger 1                                                        | 1.19448 |
| AW235671  | THAP2    | THAP domain containing, apoptosis associated protein 2                      | 1.19313 |
| BG231932  | TPP1     | tripeptidyl peptidase I                                                     | 1.19254 |
| AL544094  | TMX4     | thioredoxin-related transmembrane protein 4                                 | 1.19086 |
| NM_004900 | APOBEC3B | apolipoprotein B mRNA editing enzyme, catalytic polypeptide-like 3B         | 1.19035 |
| H15278    | TULP4    | tubby like protein 4                                                        | 1.18888 |
| NM_004327 | BCR      | breakpoint cluster region                                                   | 1.18774 |
| H43976    | MORF4L2  | mortality factor 4 like 2                                                   | 1.18765 |
| AW292752  | OFD1     | oral-facial-digital syndrome 1                                              | 1.18612 |
| AF131780  | TXNDC11  | thioredoxin domain containing 11                                            | 1.18487 |
| BF002296  | JMJD1C   | jumonji domain containing 1C                                                | 1.18482 |
| NM_018986 | SH3TC1   | SH3 domain and tetratricopeptide repeats 1                                  | 1.18396 |
| BC036731  | ZBTB24   | zinc finger and BTB domain containing 24                                    | 1.18298 |
| AL832081  | ZNF131   | zinc finger protein 131                                                     | 1.18258 |
| H48516    | DLEU2    | deleted in lymphocytic leukemia 2 (non-protein coding)                      | 1.18123 |
| NM_003645 | SLC27A2  | solute carrier family 27 (fatty acid transporter), member 2                 | 1.1812  |
| AI919493  | RRN3P2   | RNA polymerase I transcription factor homolog (S. cerevisiae) pseudogene 2  | 1.18002 |
| AF237813  | ABAT     | 4-aminobutyrate aminotransferase                                            | 1.17737 |
| NM_003319 | TTN      | titin                                                                       | 1.17736 |
| BC031525  | PTPRC    | protein tyrosine phosphatase, receptor type, C                              | 1.17619 |
| NM_001995 | ACSL1    | acyl-CoA synthetase long-chain family member 1                              | 1.17446 |
| AF251061  | NCALD    | neurocalcin delta                                                           | 1.17101 |
| NM_000389 | CDKN1A   | cyclin-dependent kinase inhibitor 1A (p21, Cip1)                            | 1.16986 |
| BC013132  | GDAP2    | ganglioside induced differentiation associated protein 2                    | 1.16972 |
| CA391618  | GPBP1L1  | GC-rich promoter binding protein 1-like 1                                   | 1.16945 |
| NM_018638 | ETNK1    | ethanolamine kinase 1                                                       | 1.16872 |
| AW157311  | C16orf87 | chromosome 16 open reading frame 87                                         | 1.16702 |
| AI202969  | OSBPL3   | oxysterol binding protein-like 3                                            | 1.16653 |
| U08015    | NFATC1   | nuclear factor of activated T-cells, cytoplasmic, calcineurin-dependent 1   | 1.16552 |
| NM_004384 | CSNK1G3  | casein kinase 1, gamma 3                                                    | 1.16484 |
| NM_018454 | NUSAP1   | nucleolar and spindle associated protein 1                                  | 1.16479 |
| AA504595  | DCP2     | DCP2 decapping enzyme homolog (S. cerevisiae)                               | 1.16105 |
| NM_004523 | KIF11    | kinesin family member 11                                                    | 1.15815 |
| NM_003243 | TGFB3    | transforming growth factor, beta receptor III                               | 1.15802 |
| AK001782  | CXXC5    | CXXC finger 5                                                               | 1.15781 |
| U20350    | CX3CR1   | chemokine (C-X3-C motif) receptor 1                                         | 1.15749 |
| NM_022349 | MS4A6A   | membrane-spanning 4-domains, subfamily A, member 6A                         | 1.15526 |
| BF732480  | TMEM64   | transmembrane protein 64                                                    | 1.15309 |
| BF514975  | UFM1     | ubiquitin-fold modifier 1                                                   | 1.15044 |
| AK090692  | FYN      | FYN oncogene related to SRC, FGR, YES                                       | 1.14906 |
| NM_014380 | NGFRAP1  | nerve growth factor receptor (TNFRSF16) associated protein 1                | 1.14906 |
| NM_025079 | ZC3H12A  | zinc finger CCCH-type containing 12A                                        | 1.14607 |
| AF054818  | CD84     | CD84 molecule                                                               | 1.14566 |
| AB051513  | ZC3H12C  | zinc finger CCCH-type containing 12C                                        | 1.14441 |
| NM_004356 | CD81     | CD81 molecule                                                               | 1.14267 |
| AI949827  | NFE2L3   | nuclear factor (erythroid-derived 2)-like 3                                 | 1.14198 |
| AI880383  | NKTR     | natural killer-tumor recognition sequence                                   | 1.13965 |
| AB017493  | KLF6     | Kruppel-like factor 6                                                       | 1.13652 |
| AI093579  | ITGAV    | integrin, alpha V (vitronectin receptor, alpha polypeptide, antigen CD51)   | 1.13438 |
| AI825832  | CDHR1    | cadherin-related family member 1                                            | 1.13248 |
| NM_016061 | YPEL5    | yippee-like 5 (Drosophila)                                                  | 1.12967 |
| BC030578  | EIF4G3   | eukaryotic translation initiation factor 4 gamma, 3                         | 1.12843 |
| J03223    | SRGN     | serglycin                                                                   | 1.12832 |
| BU950380  | ZBTB1    | zinc finger and BTB domain containing 1                                     | 1.12676 |
| AB023212  | PCNX     | pecanex homolog (Drosophila)                                                | 1.12448 |
| AB077208  | TYMS     | thymidylate synthetase                                                      | 1.11932 |
| NM_003405 | YWHAH    | tyrosine 3-monooxygenase/tryptophan 5-monooxygenase activation protein, eta | 1.11676 |
| NM_004184 | WARS     | tryptophanyl-tRNA synthetase                                                | 1.11521 |
| BC008300  | PCNXL2   | pecanex-like 2 (Drosophila)                                                 | 1.11288 |
| BC015430  | SELI     | selenoprotein I                                                             | 1.11119 |
| BG913589  | DNAJC3   | DnaJ (Hsp40) homolog, subfamily C, member 3                                 | 1.11169 |
| AK027074  | ZNF451   | zinc finger protein 451                                                     | 1.11054 |
| NM_022065 | THADA    | thyroid adenoma associated                                                  | 1.1098  |
| W79537    | CELF2    | CUGBP, Elav-like family member 2                                            | 1.10942 |
| BC001465  | HBS1L    | HBS1-like (S. cerevisiae)                                                   | 1.10801 |
| NM_002436 | MPP1     | membrane protein, palmitoylated 1, 55kDa                                    | 1.1076  |
| BQ944989  | STRAP    | serine/threonine kinase receptor associated protein                         | 1.10709 |
| NM_001992 | F2R      | coagulation factor II (thrombin) receptor                                   | 1.10679 |
| NM_003358 | UGCG     | UDP-glucose ceramide glucosyltransferase                                    | 1.10648 |
| AB032261  | SCD      | stearoyl-CoA desaturase (delta-9-desaturase)                                | 1.1059  |
| BG031974  | IGF2R    | insulin-like growth factor 2 receptor                                       | 1.10545 |
| BF593977  | MED31    | mediator complex subunit 31                                                 | 1.10531 |
| AA903184  | DDX50    | DEAD (Asp-Glu-Ala-Asp) box polypeptide 50                                   | 1.10438 |









|           |         |                                                                              |         |
|-----------|---------|------------------------------------------------------------------------------|---------|
| AF220023  | TRIM4   | tripartite motif-containing 4                                                | -1.7122 |
| NM_005010 | NRCAM   | neuronal cell adhesion molecule                                              | -1.7688 |
| NM_006417 | IFI44   | interferon-induced protein 44                                                | -1.7792 |
| AF349314  | PNO1    | partner of NOB1 homolog (S. cerevisiae)                                      | -1.7843 |
| NM_002526 | NT5E    | 5'-nucleotidase, ecto (CD73)                                                 | -1.7892 |
| NM_005232 | EPHA1   | EPH receptor A1                                                              | -1.8223 |
| NM_002547 | OPHN1   | oligophrenin 1                                                               | -1.8232 |
| AA005361  | C2orf89 | chromosome 2 open reading frame 89                                           | -1.8705 |
| NM_006472 | TXNIP   | thioredoxin interacting protein                                              | -1.8708 |
| AL136179  | SOX4    | SRY (sex determining region Y)-box 4                                         | -1.8742 |
| AI244661  | MPP7    | membrane protein, palmitoylated 7 (MAGUK p55 subfamily member 7)             | -1.906  |
| BE139156  | CASP2   | caspase 2, apoptosis-related cysteine peptidase                              | -1.9088 |
| AW474158  | ZNF528  | zinc finger protein 528                                                      | -1.9122 |
| AF288571  | LEF1    | lymphoid enhancer-binding factor 1                                           | -1.9223 |
| NM_024906 | SCD5    | stearoyl-CoA desaturase 5                                                    | -1.9368 |
| NM_003328 | TXK     | TXK tyrosine kinase                                                          | -1.9895 |
| AK025298  | AUTS2   | autism susceptibility candidate 2                                            | -2.0109 |
| NM_005825 | RASGRP2 | RAS guanyl releasing protein 2 (calcium and DAG-regulated)                   | -2.0246 |
| NM_000574 | CD55    | CD55 molecule, decay accelerating factor for complement (Cromer blood group) | -2.0424 |
| NM_007334 | KLRD1   | killer cell lectin-like receptor subfamily D, member 1                       | -2.0424 |
| AJ417079  | RARA    | retinoic acid receptor, alpha                                                | -2.1008 |
| NM_001838 | CCR7    | chemokine (C-C motif) receptor 7                                             | -2.1201 |
| NM_001877 | CR2     | complement component (3d/Epstein Barr virus) receptor 2                      | -2.1209 |
| AB007892  | CDC5L   | CDC5 cell division cycle 5-like (S. pombe)                                   | -2.126  |
| NM_020404 | CD248   | CD248 molecule, endosialin                                                   | -2.231  |
| NM_002467 | MYC     | v-myc myelocytomatosis viral oncogene homolog (avian)                        | -2.2583 |
| NM_020405 | PLXDC1  | plexin domain containing 1                                                   | -2.2832 |
| NM_003956 | CH25H   | cholesterol 25-hydroxylase                                                   | -2.2836 |
| AB014719  | APBA2   | amyloid beta (A4) precursor protein-binding, family A, member 2              | -2.3187 |
| AI082078  | ACTN1   | actinin, alpha 1                                                             | -2.4699 |
| NM_021813 | BACH2   | BTB and CNC homology 1, basic leucine zipper transcription factor 2          | -2.4836 |
| NM_006433 | GNLY    | granulysin                                                                   | -2.7134 |
| AA156873  | PELO    | pelota homolog (Drosophila)                                                  | -2.7464 |
| NM_002261 | KLRC3   | killer cell lectin-like receptor subfamily C, member 3                       | -2.7661 |
| NM_002155 | HSPA6   | heat shock 70kDa protein 6 (HSP70B')                                         | -2.8485 |
| AL442092  | LRRN3   | leucine rich repeat neuronal 3                                               | -2.9263 |
| NM_006746 | SCML1   | sex comb on midleg-like 1 (Drosophila)                                       | -2.9851 |
| NM_005345 | HSPA1A  | heat shock 70kDa protein 1A                                                  | -2.9989 |

**Supplemental Table 2.** Disrupted pathways in TILs of patients with FL.

| <b>Disrupted pathways in CD4 TILs</b>               | <b>No. of Genes</b> | <b>Gene symbol</b>                                       |
|-----------------------------------------------------|---------------------|----------------------------------------------------------|
| Nicotinate and Nicotinamide Metabolism              | 7                   | NEK2, PRKCQ, CD38, NAMPT, PLK1, MAP3K8, ACVR2A           |
| Role of Cytokines in Communication                  | 5                   | IL26, IL1RN, IL22, IL17F, IL17A                          |
| T Helper Cell Differentiation                       | 5                   | STAT4, IL10RA, FOXP3, IL17F, IL17A                       |
| Primary Immunodeficiency Signaling                  | 4                   | IGKC, IGL@, IGHM, IGHD                                   |
| Huntington's Disease Signaling                      | 8                   | PRKCQ, HSPA1L, HSPA1A, HSPA6, CASP1, CYCS, ITPR1, CDK5R1 |
| Leukocyte Extravasation Signaling                   | 7                   | WIPF1, PRKCQ, NCF4, MAP3K4, MMP12, ACTN1, CTNND1         |
| Altered T Cell and B Cell Signaling                 | 4                   | IL1RN, LTA, IL22, IL17A                                  |
| CD27 Signaling in Lymphocytes                       | 3                   | CYCS, MAP3K8, MAP3K4                                     |
| Inositol Phosphate Metabolism                       | 5                   | NEK2, PRKCQ, PLK1, MAP3K8, ACVR2A                        |
| Mitotic Roles of Polo-Like Kinase                   | 3                   | PPP2R5C, PPP2R2B, PLK1                                   |
| mTOR Signaling                                      | 5                   | PRKCQ, DDIT4, PPP2R5C, RHOC, PPP2R2B                     |
| NF-κB Signaling                                     | 5                   | PRKCQ, BMPR1A, IL1RN, LTA, MAP3K8                        |
| Cholecystokinin/Gastrin-mediated Signaling          | 4                   | PRKCQ, IL1RN, RHOC, ITPR1                                |
| IL-22 Signaling                                     | 2                   | IL22RA2, IL22                                            |
| Breast Cancer Regulation by Stathmin1               | 6                   | ARHGEF12, PRKCQ, TUBA1A, PPP2R5C, PPP2R2B, ITPR1         |
| PI3K/AKT Signaling                                  | 4                   | PPP2R5C, PPP2R2B, MAP3K8, THEM4                          |
| Cell Cycle Regulation by BTG Family Proteins        | 2                   | PPP2R5C, PPP2R2B                                         |
| Reelin Signaling in Neurons                         | 3                   | ARHGEF12, LRP8, CDK5R1                                   |
| TGF-β Signaling                                     | 3                   | BMPR1A, ACVR1, ACVR2A                                    |
| Systemic Lupus Erythematosus Signaling              | 4                   | IL1RN, IGKC, IGL@, IGHM                                  |
| Cell Cycle: G2/M DNA Damage Checkpoint              | 2                   | PLK1, SKP1                                               |
| Ceramide Signaling                                  | 3                   | PPP2R5C, PPP2R2B, CYCS                                   |
| GNRH Signaling                                      | 4                   | PRKCQ, MAP3K8, ITPR1, MAP3K4                             |
| Regulation of Actin-based Motility by Rho           | 3                   | WIPF1, RHOC, GSN                                         |
| Hepatic Cholestasis                                 | 4                   | PRKCQ, SREBF1, IL1RN, MAP3K4                             |
| Synaptic Long Term Depression                       | 4                   | PRKCQ, PPP2R5C, PPP2R2B, ITPR1                           |
| CDK5 Signaling                                      | 3                   | PPP2R5C, PPP2R2B, CDK5R1                                 |
| RANK Signaling in Osteoclasts                       | 3                   | MAP3K8, MAP3K4, GSN                                      |
| Dendritic Cell Maturation                           | 4                   | STAT4, COL5A3, IL1RN, LTA                                |
| Calcium-induced T Lymphocyte Apoptosis              | 2                   | PRKCQ, ITPR1                                             |
| Lysine Degradation                                  | 4                   | FURIN, PPP2R5C, CASP1, YME1L1                            |
| HGF Signaling                                       | 3                   | PRKCQ, MAP3K8, MAP3K4                                    |
| Semaphorin Signaling in Neurons                     | 2                   | ARHGEF12, RHOC                                           |
| TREM1 Signaling                                     | 2                   | NOD2, CASP1                                              |
| Lymphotoxin β Receptor Signaling                    | 2                   | LTA, CYCS                                                |
| Parkinson's Signaling                               | 1                   | CYCS                                                     |
| Renin-Angiotensin Signaling                         | 3                   | PRKCQ, PTGER2, ITPR1                                     |
| RhoA Signaling                                      | 3                   | SEPT8, ARHGEF12, SEPT2                                   |
| Actin Cytoskeleton Signaling                        | 4                   | ARHGEF12, SSH2, GSN, ACTN1                               |
| Regulation of eIF4 and p70S6K Signaling             | 3                   | PPP2R5C, PPP2R2B, EIF1                                   |
| Granzyme B Signaling                                | 1                   | CYCS                                                     |
| Phenylalanine, Tyrosine and Tryptophan Biosynthesis | 1                   | ENO2                                                     |
| IL-12 Signaling and Production in Macrophages       | 3                   | STAT4, PRKCQ, MAP3K8                                     |
| Glyoxylate and Dicarboxylate Metabolism             | 1                   | HYI                                                      |
| Wnt/β-catenin Signaling                             | 4                   | PPP2R5C, PPP2R2B, ACVR1, ACVR2A                          |
| IL-10 Signaling                                     | 2                   | IL1RN, IL10RA                                            |
| IL-15 Signaling                                     | 2                   | AXL, IL17A                                               |
| Endothelin-1 Signaling                              | 4                   | PRKCQ, CASP1, PTGER2, ITPR1                              |
| ILK Signaling                                       | 4                   | PPP2R5C, RHOC, PPP2R2B, ACTN1                            |
| p70S6K Signaling                                    | 3                   | PRKCQ, PPP2R5C, PPP2R2B                                  |

| <b>Disrupted pathways in CD8 TILs</b>               | <b>No. of Genes</b> | <b>Gene symbol</b>                                                                |
|-----------------------------------------------------|---------------------|-----------------------------------------------------------------------------------|
| Antigen Presentation Pathway                        | 10                  | B2M,IFNG, HLA-DMA,HLA-DRB4,HLA-DRA,HLA-DQA1, HLA-DRB1, CD74, HLA-DPB1, HLA-DPA1   |
| Crosstalk between Dendritic Cells and NK Cells      | 16                  | IFNG,KIR3DL1,KIR2DL3, KLRD1,ACTA2,HLA-DRB1, FAS, CAMK2D, HLA-DRB4,KIR2DL5A        |
| Allograft Rejection Signaling                       | 15                  | B2M,HLA-DMA,IFNG,IL10,HLA-DQA1,HLA-DRB1,HLA-DQB1, HLA-DPA1, FAS, HLA-DRB4         |
| T Helper Cell Differentiation                       | 14                  | HLA-DMA,IFNG, IL10,IL21R,HLA-DQA1,HLA-DRB1,HLA-DQB1, IL17A,ICOS,CD8               |
| Altered T Cell and B Cell Signaling                 | 15                  | HLA-DMA,IFNG, IL1A,IL10,HLA-DQA1,HLA-DRB1,HLA-DQB1, FAS,IL17A,CD80                |
| IL-4 Signaling                                      | 10                  | PIK3R3,HLA-DMA,NFAT5,IRF4,PIK3C2A,HLA-DRA,HLA-DQA1, HLA-DRB1, NFATC1,HLA-DQB1     |
| Communication between Immune Cells                  | 12                  | B2M,IFNG, IL1A,CCL4,HLA-DRB4,CD80, IL10,HLA-DRA, HLA-DRB1, CCL3                   |
| Graft-versus-Host Disease Signaling                 | 12                  | KIR2DL3, IFNG, HLA-DMA,IL1A,CD80,HLA-DRA,HLA-DQA1, HLA-DRB1, HLA-DQB1, TNF        |
| iCOS-iCOSL Signaling                                | 16                  | HLA-DMA, CAMK4, PIK3C2A, HLA-DQA1, TRAT1, HLA-DRB1,NFATC1,HLA-DQB1, PTPRC, PIK3R3 |
| Dendritic Cell Maturation                           | 16                  | B2M,HLA-DMA,IL1A,PIK3C2A,IL10,HLA-DQA1,HLA-DRB1, CD58, HLA-DQB1,PIK3R3            |
| Systemic Lupus Erythematosus Signaling              | 14                  | IL1A,CAMK4,PIK3C2A,IL10,IGKC,NFATC1,PTPRC,PIK3R3,NFAT5,CD80                       |
| Death Receptor Signaling                            | 9                   | CASP2, TNFRSF25,CYCS,CFLAR, TNFRSF1B,TNF,FAS,FASLG, CASP10                        |
| Virus Entry via Endocytic Pathways                  | 12                  | B2M,PIK3R3,FYN,CD55,PIK3C2A,ACTA2,CAV1,ITGA6,ITGA5,TFRC                           |
| Hepatic Fibrosis / Hepatic Stellate Cell Activation | 15                  | IFNG, IL18RAP, IL1A, VCAM1, IL10, ACTA2, MYL6B, FAS, LY96, CSF1                   |
| Primary Immunodeficiency Signaling                  | 6                   | IL7R,PTPRC,ICOS,IGKC,IGHM,IGHD                                                    |
| CD28 Signaling                                      | 10                  | HLA-DMA,FYN,CAMK4,PIK3C2A,HLA-DQA1,HLA-DRB1, NFATC1, HLA-DQB1, CTLA4, PTPRC       |
| Autoimmune Thyroid Disease Signaling                | 9                   | HLA-DMA,CD80, IL10,HLA-DRA,HLA-DQA1,HLA-DRB1, HLA-DQB1, FAS,FASLG                 |
| Integrin Signaling                                  | 19                  | FYN,TSPAN5,PIK3C2A,ACTA2,LIMS1,ITGA6,ITGA5,ITGB8,BRAF, ACTN1                      |
| PI3K/AKT Signaling                                  | 10                  | CD81,PTPRC,FYN,NFAT5,CAMK4,CAMK2D,BCL10,NFATC1, PLEKHA2,CR2                       |
| Caveolar-mediated Endocytosis Signaling             | 10                  | B2M,FYN,CD55,ACTA2,ITGAV,CAV1,ITGA6,ITGA5,ITGA1,ITGB8                             |
| Myc Mediated Apoptosis Signaling                    | 8                   | PIK3R3,MYC, YWHAH,PIK3C2A,IGF1R,CYCS,FAS,FASLG                                    |
| T Cell Receptor Signaling                           | 10                  | PTPRC,PIK3R3,FYN,TKK,NFAT5,CAMK4,PIK3C2A,BCL10,NFATC1,CTLA4                       |
| CTLA4 Signaling in Cytotoxic T Lymphocytes          | 12                  | PIK3R3,FYN,HLA-DMA,CD80, PPP2R5C, PIK3C2A, HLA-DRA, HLA-DQA1, TRAT1, HLA-DRB1     |
| Glioma Invasiveness Signaling                       | 7                   | PIK3R3,F2R,PIK3C2A,RHOB,ITGAV,CD44,FNBP1                                          |
| IL-9 Signaling                                      | 5                   | PIK3R3,SOCS3,PIK3C2A,CISH,TNF                                                     |
| HMGB1 Signaling                                     | 9                   | PIK3R3,IFNG, IL1A, VCAM1, PIK3C2A, RHOB, TNFRSF1B, TNF,FNBP1                      |
| Role of NFAT in Regulation of the Immune Response   | 16                  | HLA-DMA, AKAP5, FYN, CAMK4, PIK3C2A, CSNK1G3, GNA12, HLA-DQA1, HLA-DRB1, NFATC1   |
| mTOR Signaling                                      | 10                  | PIK3R3,HMOX1,RPS27,PPP2R5C,PIK3C2A,RHOB,EIF4G3,RPS27L,FNBP1,EIF4E                 |
| Clathrin-mediated Endocytosis Signaling             | 12                  | MYO6,PIK3R3,SNX9,F2R,PIK3C2A,SH3GL3,ACTA2,ITGA5,TFRC,LDLRAP1                      |
| NF-κB Activation by Viruses                         | 10                  | PIK3R3,IL1A,PIK3C2A,BCL10,TGFBR3,IGF1R,MAP3K8, TNFRSF1B,IGF2R,TNF                 |
| Acute Myeloid Leukemia Signaling                    | 7                   | PIK3R3,BRAF,MYC,PIK3C2A,RARA,LEF1,FLT3LG                                          |
| IL-10 Signaling                                     | 7                   | HMOX1,IL18RAP,SOCS3,IL1A,BLVRA,IL10,TNF                                           |
| IL-8 Signaling                                      | 13                  | VCAM1,PIK3C2A,GNA12,PIK3R3,BRAF,HMOX1,GNB4,CDH1, CCND2, RHOB                      |
| Ceramide Signaling                                  | 7                   | PIK3R3,PPP2R5C,PIK3C2A,CYCS,TNFRSF1B,TNF,KSR1                                     |
| Actin Cytoskeleton Signaling                        | 14                  | TIAM1,F2R,PIK3C2A,ACTN1, GNA12, ACTA2, ITGA5, PIP5K1B, MYL6B, PIK3R3              |
| Pathogenesis of Multiple Sclerosis                  | 2                   | CCL4, CCL3                                                                        |

|                                           |    |                                                                                         |
|-------------------------------------------|----|-----------------------------------------------------------------------------------------|
| CCR5 Signaling                            | 6  | GNB4, CAMK4, CCL4, CCL3, FAS, FASLG                                                     |
| Thyroid Cancer Signaling                  | 4  | BRAF, MYC, CDH1, LEF1                                                                   |
| ILK Signaling                             | 13 | PPP2R5C, PIK3C2A, ACTA2, LIMS1, ITGB8, MYL6B, PIK3R3, MYC, RHOB, ACTN1                  |
| Inositol Phosphate Metabolism             | 9  | PIK3R3, BRAF, INPP4B, INPP1, INPP5F, PIK3C2A, TRAT1, MAP3K8, PIP5K1B                    |
| RhoA Signaling                            | 8  | RAPGEF2, GNA12, EPHA1, ACTA2, IGF1R, PIP5K1B, MYL6B, SEPT2                              |
| cAMP-mediated Signaling                   | 12 | BRAF, AKAP5, RGS2, AKAP2/PALM2-AKAP2, CAMK4, CAMK2D, PDE3B, PDE9A, DUSP6, CREM          |
| Apoptosis Signaling                       | 8  | CASP2, CYCS, TNFRSF1B, TNF, FAS, FASLG, MCL1, CASP10                                    |
| ERK/MAPK Signaling                        | 13 | FYN, PPP2R5C, YWHAH, PIK3C2A, DUSP6, ITGA5, NFATC1, EIF4E, KSR1, PIK3R3                 |
| Role of Cytokines in Communication        | 5  | IFNG, IL1A, IL10, TNF, IL17A                                                            |
| LXR/RXR Activation                        | 8  | IL18RAP, SCD, LY96, IL1A, LPL, TNFRSF1B, TNF, PON3                                      |
| Rac Signaling                             | 8  | PIK3R3, TIAM1, PIK3C2A, CYFIP1, CD44, ITGA5, PIP5K1B, NCKAP1                            |
| Cytotoxic T Lymphocyte-mediated Apoptosis | 12 | B2M, HLA-DMA, HLA-DRB4, HLA-DRA, HLA-DQA1, HLA-DRB1, CYCS, HLA-DQB1, HLA-DPB1, HLA-DPA1 |
| SAPK/JNK Signaling                        | 7  | PIK3R3, GADD45A, PIK3C2A, DUSP10, GNA12, NFATC1, DUSP4                                  |
| Wnt/ $\beta$ -catenin Signaling           | 11 | SOX4, MYC, CDH1, SOX6, PPP2R5C, WNT10A, CSNK1G3, TGFB3, RARA, CD44                      |

**Supplemental Table 3**

| <b>symbol</b> | <b>NAME</b>                                                              | <b>fold change in CD4</b> | <b>fold change in CD8</b> |
|---------------|--------------------------------------------------------------------------|---------------------------|---------------------------|
| PMCH          | pro-melanin-concentrating hormone                                        | 3.20                      | 4.67                      |
| NR4A2         | nuclear receptor subfamily 4, group A, member 2                          | 3.14                      | 2.96                      |
| NAMPT         | nicotinamide phosphoribosyltransferase                                   | 2.58                      | 3.08                      |
| CHN1          | chimerin (chimaerin) 1                                                   | 2.34                      | 2.56                      |
| TNFRSF9       | tumor necrosis factor receptor superfamily, member 9                     | 2.26                      | 3.70                      |
| NAP1L2        | nucleosome assembly protein 1-like 2                                     | 2.25                      | 2.42                      |
| PELI1         | pellino homolog 1 (Drosophila)                                           | 2.17                      | 2.72                      |
| MAP3K8        | mitogen-activated protein kinase kinase kinase 8                         | 2.16                      | 3.18                      |
| PMAIP1        | phorbol-12-myristate-13-acetate-induced protein 1                        | 2.13                      | 3.02                      |
| GZMK          | granzyme K (granzyme 3; tryptase II)                                     | 2.11                      | 1.31                      |
| NUPL1         | nucleoporin like 1                                                       | 2.11                      | 1.97                      |
| YME1L1        | YME1-like 1 (S. cerevisiae)                                              | 2.02                      | 2.09                      |
| SNORA28       | small nucleolar RNA, H/ACA box 28                                        | 1.97                      | 1.62                      |
| GSPT1         | G1 to S phase transition 1                                               | 1.92                      | 1.99                      |
| DUSP4         | dual specificity phosphatase 4                                           | 1.89                      | 2.98                      |
| ASXL1         | additional sex combs like 1 (Drosophila)                                 | 1.88                      | 1.47                      |
| ATP1B1        | ATPase, Na <sup>+</sup> /K <sup>+</sup> transporting, beta 1 polypeptide | 1.87                      | 1.30                      |
| SLC20A1       | solute carrier family 20, member 1                                       | 1.84                      | 2.04                      |
| ZBTB24        | zinc finger and BTB domain containing 24                                 | 1.82                      | 1.18                      |
| SNRPA1        | small nuclear ribonucleoprotein polypeptide A'                           | 1.82                      | 1.41                      |
| CHD2          | chromodomain helicase DNA binding protein 2                              | 1.77                      | 1.94                      |
| CYCS          | cytochrome c, somatic                                                    | 1.74                      | 1.52                      |
| RASGEF1A      | RasGEF domain family, member 1A                                          | 1.68                      | 2.23                      |
| BEX5          | brain expressed, X-linked 5                                              | 1.67                      | 1.46                      |
| CD44          | CD44 molecule (Indian blood group)                                       | 1.66                      | 1.53                      |
| MORF4L2       | mortality factor 4 like 2                                                | 1.65                      | 1.19                      |
| CADM1         | cell adhesion molecule 1                                                 | 1.64                      | 4.24                      |
| IDS           | iduronate 2-sulfatase                                                    | 1.62                      | 1.43                      |
| DCAF8         | DDB1 and CUL4 associated factor 8                                        | 1.60                      | 1.82                      |
| PRO2852       | hypothetical protein PRO2852                                             | 1.60                      | 1.38                      |
| RPS27         | ribosomal protein S27                                                    | 1.58                      | 2.81                      |
| FLJ38717      | FLJ38717 protein                                                         | 1.57                      | 1.31                      |
| VPS13C        | vacuolar protein sorting 13 homolog C (S. cerevisiae)                    | 1.57                      | 1.46                      |
| LHFP          | lipoma HMGIC fusion partner                                              | 1.55                      | 1.38                      |
| ZFAND6        | zinc finger, AN1-type domain 6                                           | 1.50                      | 1.89                      |
| PCNX          | pecanex homolog (Drosophila)                                             | 1.47                      | 1.12                      |
| CREB3L2       | cAMP responsive element binding protein 3-like 2                         | 1.46                      | 1.62                      |
| UBE2D3        | ubiquitin-conjugating enzyme E2D 3 (UBC4/5 homolog)                      | 1.45                      | 1.26                      |
| TMEM155       | transmembrane protein 155                                                | 1.43                      | 3.89                      |
| MBNL1         | muscleblind-like (Drosophila)                                            | 1.43                      | 1.30                      |
| PHLDA1        | pleckstrin homology-like domain, family A, member 1                      | 1.41                      | 2.23                      |
| SFRS18        | splicing factor, arginine/serine-rich 18                                 | 1.40                      | 1.38                      |
| NINJ2         | ninjurin 2                                                               | 1.39                      | 2.58                      |
| PPP2R5C       | protein phosphatase 2, regulatory subunit B', gamma 5                    | 1.37                      | 1.38                      |
| TGFBR3        | transforming growth factor, beta receptor III                            | 1.35                      | 1.16                      |
| PAM           | peptidylglycine alpha-amidating monooxygenase                            | 1.35                      | 2.47                      |
| TRA2A         | transformer 2 alpha homolog (Drosophila)                                 | 1.35                      | 1.26                      |
| NFE2L3        | nuclear factor (erythroid-derived 2)-like 3                              | 1.35                      | 1.04                      |
| NGFRAP1       | nerve growth factor receptor (TNFRSF16) associated protein 1             | 1.33                      | 1.15                      |
| REV3L         | REV3-like, catalytic subunit of DNA polymerase zeta (yeast)              | 1.31                      | 1.41                      |
| ATP9A         | ATPase, class II, type 9A                                                | 1.31                      | 3.34                      |
| WIPF1         | WAS/WASL interacting protein family, member 1                            | 1.30                      | 1.39                      |



|              |                                                                |       |       |
|--------------|----------------------------------------------------------------|-------|-------|
| SOCS3        | suppressor of cytokine signaling 3                             | 1.30  | 1.02  |
| KLF6         | Kruppel-like factor 6                                          | 1.27  | 1.16  |
| FNBP1        | formin binding protein 1                                       | 1.26  | 1.52  |
| LPXN         | leupaxin                                                       | 1.26  | 1.62  |
| JMJD1C       | jumonji domain containing 1C                                   | 1.25  | 1.18  |
| ETV1         | ets variant 1                                                  | 1.25  | 4.12  |
| LOC100190986 | hypothetical LOC100190986                                      | 1.24  | 1.50  |
| PIK3C2A      | phosphoinositide-3-kinase, class 2, alpha polypeptide          | 1.24  | 1.08  |
| ARID2        | AT rich interactive domain 2 (ARID, RFX-like)                  | 1.24  | 1.67  |
| NOD2         | nucleotide-binding oligomerization domain containing 2         | 1.23  | 2.30  |
| TNF          | tumor necrosis factor (TNF superfamily, member 2)              | 1.22  | 1.33  |
| SKP1         | S-phase kinase-associated protein 1                            | 1.20  | 1.22  |
| NCRNA00182   | non-protein coding RNA 182                                     | 1.19  | 1.49  |
| MED31        | mediator complex subunit 31                                    | 1.17  | 1.11  |
| QKI          | quaking homolog, KH domain RNA binding (mouse)                 | 1.16  | 1.55  |
| B4GALT1      | UDP-Gal:betaGlcNAc beta 1,4- galactosyltransferase, p          | 1.15  | 1.35  |
| MED6         | mediator complex subunit 6                                     | 1.15  | 1.02  |
| LPL          | lipoprotein lipase                                             | 1.13  | 1.69  |
| DLG1         | discs, large homolog 1 (Drosophila)                            | 1.12  | 1.36  |
| MALAT1       | metastasis associated lung adenocarcinoma transcript 1         | 1.11  | 1.34  |
| ZNF131       | zinc finger protein 131                                        | 1.11  | 1.18  |
| BCL10        | B-cell CLL/lymphoma 10                                         | 1.11  | 1.32  |
| SFXN3        | sideroflexin 3                                                 | 1.10  | 1.21  |
| SFRS4        | splicing factor, arginine/serine-rich 4                        | 1.10  | 1.01  |
| B2M          | beta-2-microglobulin                                           | 1.10  | 1.54  |
| PCBP2        | poly(rC) binding protein 2                                     | 1.09  | 1.56  |
| PSMD7        | proteasome (prosome, macropain) 26S subunit, non-A'            | 1.09  | 1.21  |
| SKIL         | SKI-like oncogene                                              | 1.09  | 1.08  |
| ATXN1        | ataxin 1                                                       | 1.09  | 1.91  |
| YPEL5        | yippee-like 5 (Drosophila)                                     | 1.08  | 1.13  |
| IL10RA       | interleukin 10 receptor, alpha                                 | 1.07  | 1.03  |
| NGLY1        | N-glycanase 1                                                  | 1.07  | 1.35  |
| SFRS15       | splicing factor, arginine/serine-rich 15                       | 1.07  | 1.09  |
| GADD45A      | growth arrest and DNA-damage-inducible, alpha                  | 1.06  | 1.05  |
| DDX50        | DEAD (Asp-Glu-Ala-Asp) box polypeptide 50                      | 1.05  | 1.10  |
| GOLGA4       | golgin A4                                                      | 1.05  | 1.56  |
| LOC442113    | similar to protein tyrosine phosphatase, non-receptor tyrosine | 1.04  | 1.31  |
| ZMYM2        | zinc finger, MYM-type 2                                        | 1.04  | 1.29  |
| CLK4         | CDC-like kinase 4                                              | 1.03  | 1.36  |
| ST8SIA1      | ST8 alpha-N-acetyl-neuraminide alpha-2,8-sialyltransferase     | 1.01  | 2.11  |
| METTL8       | methyltransferase like 8                                       | 1.01  | 1.30  |
| NKTR         | natural killer-tumor recognition sequence                      | 1.01  | 1.14  |
| RNF34        | ring finger protein 34                                         | 1.00  | 1.08  |
| CR2          | complement component (3d/Epstein Barr virus) receptor 2        | -1.02 | -2.12 |
| TXNIP        | thioredoxin interacting protein                                | -1.10 | -1.87 |
| PN01         | partner of NOB1 homolog (S. cerevisiae)                        | -1.10 | -1.78 |
| ZNF528       | zinc finger protein 528                                        | -1.21 | -1.91 |
| SESN1        | sestrin 1                                                      | -1.30 | -1.49 |
| CASP2        | caspase 2, apoptosis-related cysteine peptidase                | -1.36 | -1.91 |
| DDIT4        | DNA-damage-inducible transcript 4                              | -1.38 | -1.24 |
| ACTN1        | actinin, alpha 1                                               | -1.42 | -1.95 |
| RARA         | retinoic acid receptor, alpha                                  | -1.42 | -2.10 |
| AUTS2        | autism susceptibility candidate 2                              | -1.90 | -2.01 |

|        |                                      |       |       |
|--------|--------------------------------------|-------|-------|
| HSPA1A | heat shock 70kDa protein 1A          | -2.06 | -3.00 |
| HSPA6  | heat shock 70kDa protein 6 (HSP70B') | -2.92 | -2.85 |
| CH25H  | cholesterol 25-hydroxylase           | -3.07 | -2.28 |
| IL17A  | interleukin 17A                      | -3.94 | -1.21 |

**Supplemental Table 4.** Summary of clinical characteristics of patients' samples used in the TMA.

|                                        | <b>No. of patients</b> | <b>Percentage</b> |
|----------------------------------------|------------------------|-------------------|
| Total No. of patients                  | 172                    | 100               |
| Median age at diagnosis, yr<br>(range) |                        | 55 (24-85)        |
| Gender                                 |                        |                   |
| Male                                   | 100                    | 58.14             |
| Female                                 | 72                     | 41.86             |
| Specimen type                          |                        |                   |
| FFPE                                   | 172                    | 100               |
| Therapy regimen                        |                        |                   |
| RITUXIMAB                              | 33                     | 19.18             |
| Non-RITUXIMAB                          | 139                    | 80.82             |
| Bone Marrow Involvement                | 81                     | 47.09             |
| Stage at diagnosis                     |                        |                   |
| I                                      | 25                     | 14.53             |
| II                                     | 21                     | 12.21             |
| III                                    | 28                     | 16.28             |
| IV                                     | 98                     | 56.98             |
| FLIPI score                            |                        |                   |
| Low [1]                                | 42                     | 24.42             |
| Intermediate [2]                       | 37                     | 21.50             |
| High [3]                               | 47                     | 27.33             |
| Not assessable [4]                     | 35                     | 20.35             |
| Not known                              | 11                     | 6.40              |
| Grade at diagnosis                     |                        |                   |
| 1                                      | 87                     | 50.59             |
| 2                                      | 58                     | 33.72             |
| 3A                                     | 9                      | 5.23              |
| 3B                                     | 3                      | 1.74              |
| unknown                                | 15                     | 8.72              |
| Histological pattern                   |                        |                   |
| Follicular                             | 170                    | 98.84             |
| Follicular and diffuse                 | 2                      | 1.16              |
| Proceeded to Transformation            | 41                     | 23.84             |
| Time to Transformation, yr             |                        |                   |
| 0-5                                    | 25                     | 60.98*            |
| 6-10                                   | 9                      | 21.95*            |
| >11                                    | 7                      | 17.07*            |
| Cause of death                         |                        |                   |
| Alive                                  | 51                     | 29.65             |
| Disease                                | 75                     | 43.61             |
| Unrelated                              | 37                     | 21.51             |
| unknown                                | 9                      | 5.23              |

(FFPE) Formalin-fixed paraffin-embedded, (TT) Time to Transformation, \* Of transformed

**Supplemental Table 5** Representative genes with altered expression in both CD4 and CD8 TILs in FL compared to tonsil. Gene products highlighted in yellow were studied using MAbs in TMA. For those proteins highlighted in green no MAbs tested worked reliably in paraffin embedded tissue and for those highlighted in blue, no MAbs could be found.

| Gene Title                                                               | Gene Symbol       | Fold change in CD4 | Fold change in CD8 |
|--------------------------------------------------------------------------|-------------------|--------------------|--------------------|
| pro-melanin-concentrating hormone                                        | PMCH              | 3.20               | 4.67               |
| nuclear receptor subfamily 4, group A, member 2                          | NR4A2             | 3.14               | 2.96               |
| Nicotinamide phosphoribosyltransferase                                   | NAMPT(Visfatin-1) | 2.58               | 3.08               |
| chimerin (chimaerin) 1                                                   | CHN1              | 2.34               | 2.55               |
| CD200                                                                    | CD200             | -                  | 2.75               |
| tumor necrosis factor receptor superfamily, member 9                     | TNFRSF9           | 2.26               | 3.70               |
| nucleosome assembly protein 1-like 2                                     | NAP1L2            | 2.25               | 2.42               |
| Pellino homolog 1 (Drosophila)                                           | PEL1              | 2.17               | 2.72               |
| Mitogen-activated protein kinase kinase kinase 8                         | MAP3K8            | 2.16               | 3.18               |
| phorbol-12-myristate-13-acetate-induced protein 1                        | PMAIP1            | 2.13               | 3.02               |
| Nucleoporin like 1                                                       | NUPL1             | 2.11               | 1.97               |
| granzyme K (granzyme 3; tryptase II)                                     | GZMK              | 2.11               | 1.31               |
| YME1-like 1 (S. cerevisiae)                                              | YME1L1            | 2.02               | 2.09               |
| small nucleolar RNA, H/ACA box 28                                        | SNORA28           | 1.97               | 1.02               |
| G1 to S phase transition 1                                               | GSPT1             | 1.92               | 1.99               |
| Solute carrier family 20, member 1                                       | SLC20A1           | 1.84               | 2.04               |
| Small nuclear ribonucleoprotein polypeptide A'                           | SNRPA1            | 1.82               | 1.41               |
| Chromodomain helicase DNA binding protein 2                              | CHD2              | 1.77               | 1.95               |
| cytochrome c, somatic                                                    | CYCS              | 1.74               | 1.52               |
| FLJ38717 protein                                                         | FLJ38717          | 1.57               | 1.31               |
| Zinc finger, AN1-type domain 6                                           | ZFAND6            | 1.50               | 1.89               |
| pleckstrin homology-like domain, family A, member 1                      | PHLDA1            | 1.48               | 2.23               |
| peptidylglycine alpha-amidating monooxygenase                            | PAM               | 1.35               | 2.19               |
| ATPase, Na <sup>+</sup> /K <sup>+</sup> transporting, beta 1 polypeptide | ATP1B1            | 1.29               | 1.30               |
| ets variant 1                                                            | ETV1 (ER81)       | 1.25               | 4.12               |
| nucleotide-binding oligomerization domain containing 2                   | NOD2              | 1.23               | 2.30               |
| complement component receptor 2                                          | CR2               | -1.02              | -2.12              |
| sestrin 1                                                                | SESN1             | -1.30              | -1.49              |
| actinin, alpha 1                                                         | ACTN1             | -1.42              | -2.47              |
| autism susceptibility candidate 2                                        | AUTS2             | -1.90              | -2.01              |
| heat shock 70kDa protein 1A                                              | HSPA1A            | -2.06              | -3.00              |
| heat shock 70kDa protein 6 (HSP70B')                                     | HSPA6             | -2.92              | -2.85              |
| cholesterol 25-hydroxylase                                               | CH25H             | -3.07              | -2.85              |
| interleukin 17A                                                          | IL17A             | -3.94              | -1.21              |

**Supplemental Table 6-** Univariate, multivariate and cut-off points used for OS, DSS and TT.

| End point | Model variables                                                         | Cut-off | Univariate analysis |             |        | Multivariate analysis |            |       |
|-----------|-------------------------------------------------------------------------|---------|---------------------|-------------|--------|-----------------------|------------|-------|
|           |                                                                         |         | HR                  | 95% CI      | p      | HR                    | 95% CI     | p     |
| OS        | No of PMCH positive cells in intrafollicular area: high vs low          | 24.27   | 3.29                | 1.11-4.11   | 0.034  | 0.96                  | 0.46-1.98  | 0.91  |
|           | No of PMCH positive cells in interfollicular area: high vs low          | 1148.98 | 0.68                | 0.02-1.29   | 0.0002 | 0.92                  | 0.5-1.8    | 0.82  |
|           | No of ETV1 positive cells in intrafollicular area: high vs low          | 209.12  | 1.60                | 0.67-2.06   | 0.045  | 1.8                   | 0.86-4.65  | 0.15  |
|           | No of ETV1 positive cells in interfollicular area: high vs low          | 197.66  | 1.53                | -0.025-1.32 | 0.03   | 0.9                   | 0.41-1.89  | 0.75  |
|           | No of NAMPT positive cells in intrafollicular area: high vs low         | 75.9    | 2.32                | -0.060-1.31 | 0.02   | 0.8                   | 0.37-1.55  | 0.55  |
|           | No of NAMPT positive cells in interfollicular area: high vs low         | 70.29   |                     | -0.041-1.18 | 0.008  | 0.9                   | 0.45-1.7   | 0.75  |
|           | Combined model of PMCH, NAMPT and ratio of ETV1                         |         |                     |             |        | 0.32                  | 0.1-0.61   | 0.007 |
|           | Age: above vs below median                                              |         |                     |             |        | 1.1                   | 1.06-1.1   | 0.009 |
|           | Gender                                                                  |         |                     |             |        | 0.75                  | 0.45-1.28  | 0.3   |
|           | Grade: 1-3                                                              |         |                     |             |        | 0.98                  | 0.85-1.25  | 0.95  |
|           | Stage: 1-4                                                              |         |                     |             |        | 1.25                  | 1.03-1.6   | 0.04  |
| TT        | No of PMCH positive cells in intrafollicular area: high vs low          | 344.67  | 0.22                | 0.07-0.69   | 0.029  | 1.55                  | 0.46-5.22  | 0.48  |
|           | MI of PMCH expression in intrafollicular area: high vs low              | 65.58   | 2.06                | 1.03-5.15   | 0.040  | 3.07                  | 0.97-9.63  | 0.049 |
|           | No of PMCH positive cells in interfollicular area: high vs low          | 1171.3  | 4.88                | 1.75-13.63  | 0.033  | 0.27                  | 0.10-0.71  | 0.008 |
|           | MI of PMCH expression in total area: high vs low                        | 16.85   | 0.39                | 0.18-0.84   | 0.015  | 4.73                  | 0.88-25.25 | 0.07  |
|           | No of ETV1 positive cells in intrafollicular area: high vs low          | 12      | 0.35                | 0.15-0.78   | 0.022  | 3.21                  | 0.4-25.31  | 0.27  |
|           | MI of ETV1 expression in interfollicular area: high vs low              | 46.17   | 4.60                | 1.75-12.14  | 0.005  | 1.75                  | 0.68-4.46  | 0.23  |
|           | MI of NAMPT expression in intrafollicular area: high vs low             | 75.14   | 0.40                | 0.19-0.82   | 0.003  | 0.36                  | 0.15-0.86  | 0.02  |
|           | MI of NAMPT expression in total area: high vs low                       | 68.15   | 3.47                | 1.11-10.79  | 0.043  | 0.79                  | 0.65-1.43  | 0.32  |
|           | percentage of NAMPT positive cells in total area: high vs low           | 2.03    | 6.54                | 1.83-23.36  | 0.025  | 0.39                  | 0.11-1.32  | 0.13  |
|           | Combined model of ratio of PMCH, and level of NAMPT and ETV1 expression |         |                     |             |        | 0.19                  | 0.09-0.47  | 0.003 |
|           | Age: above vs below median                                              |         |                     |             |        | 1.04                  | 1.00-1.09  | 0.04  |
|           | Gender:                                                                 |         |                     |             |        | 3.7                   | 1.52-9.31  | 0.004 |
|           | Grade: 1-3                                                              |         |                     |             |        | 0.80                  | 0.59-1.09  | 0.16  |

Note: Hazard ratios (HRs) >1 or <1 indicate an increased or decreased risk, respectively, of an event for the 1<sup>st</sup> category listed.  
Abbreviations: DSS, disease specific survivals; TT, time to transformation; MI, mean intensity.
